# Supplementary material
Source: publisher figshare collection journal article supplement (https://frontiersin.figshare.com/ndownloader/files/14905988)

**Supplementary Figure 1.** Relative abundance of the 30 most-abundant genera in infant fecal samples ( $n = 40$ ) collected in rural Ethiopia. Each bar represents a single sample.

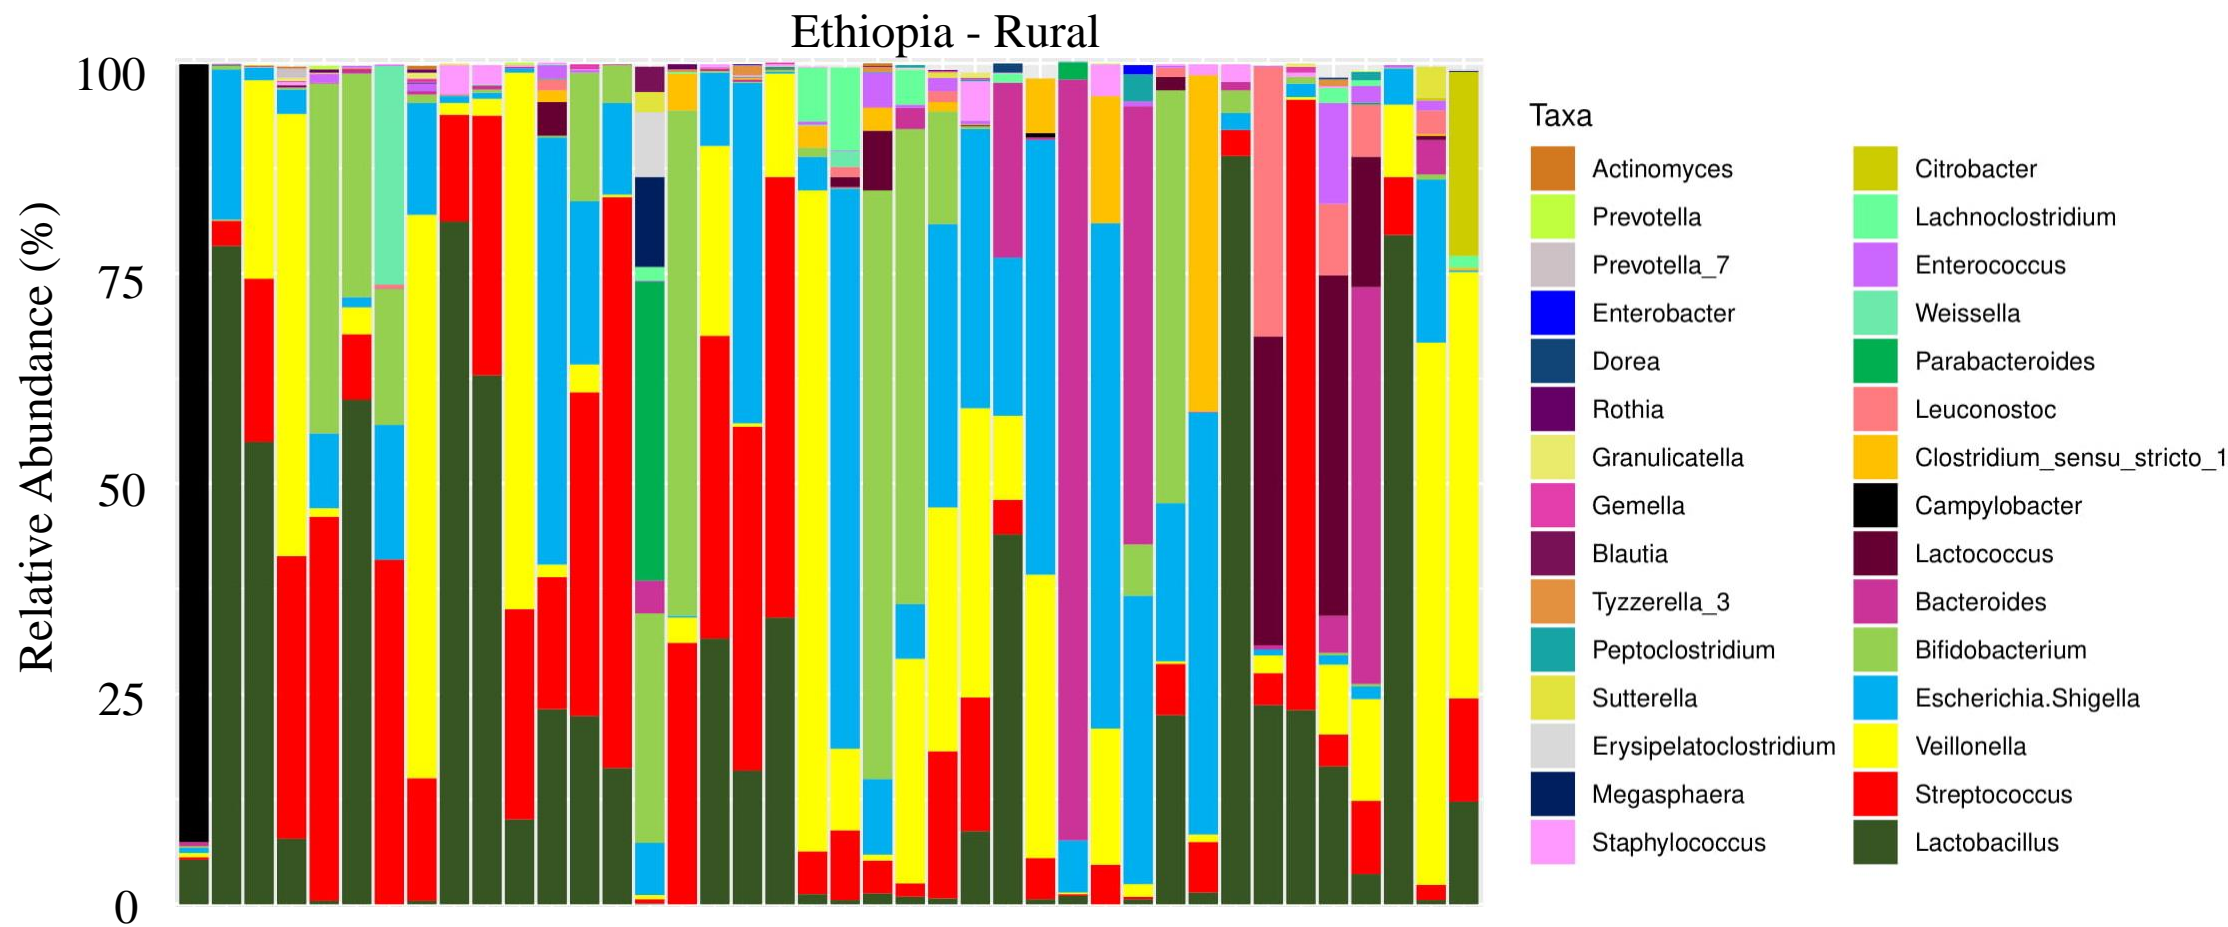

**Supplementary Figure 2.** Relative abundance of the 30 most-abundant genera in infant fecal samples ( $n = 32$ ) collected in urban Ethiopia. Each bar represents a single sample.

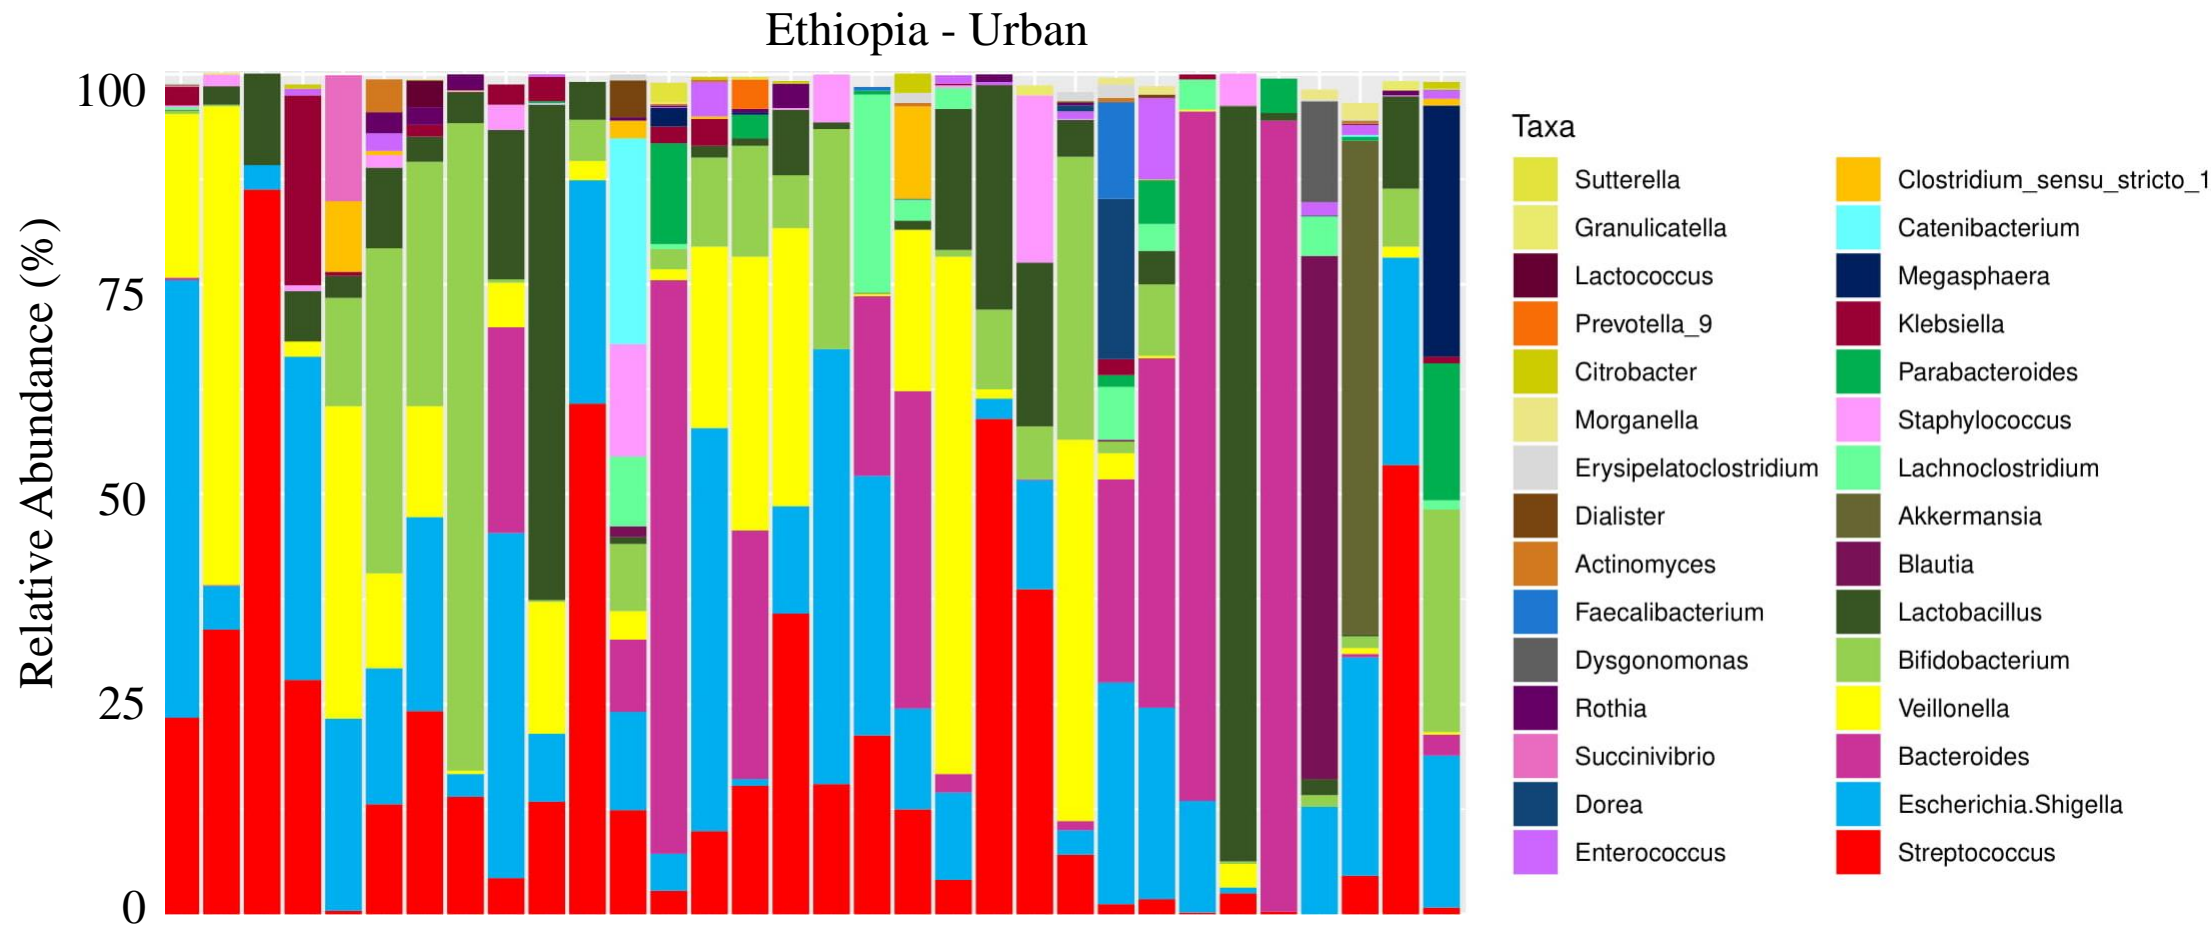

**Supplementary Figure 3.** Relative abundance of the 30 most-abundant genera in infant fecal samples ( $n = 38$ ) collected in rural Gambia. Each bar represents a single sample.

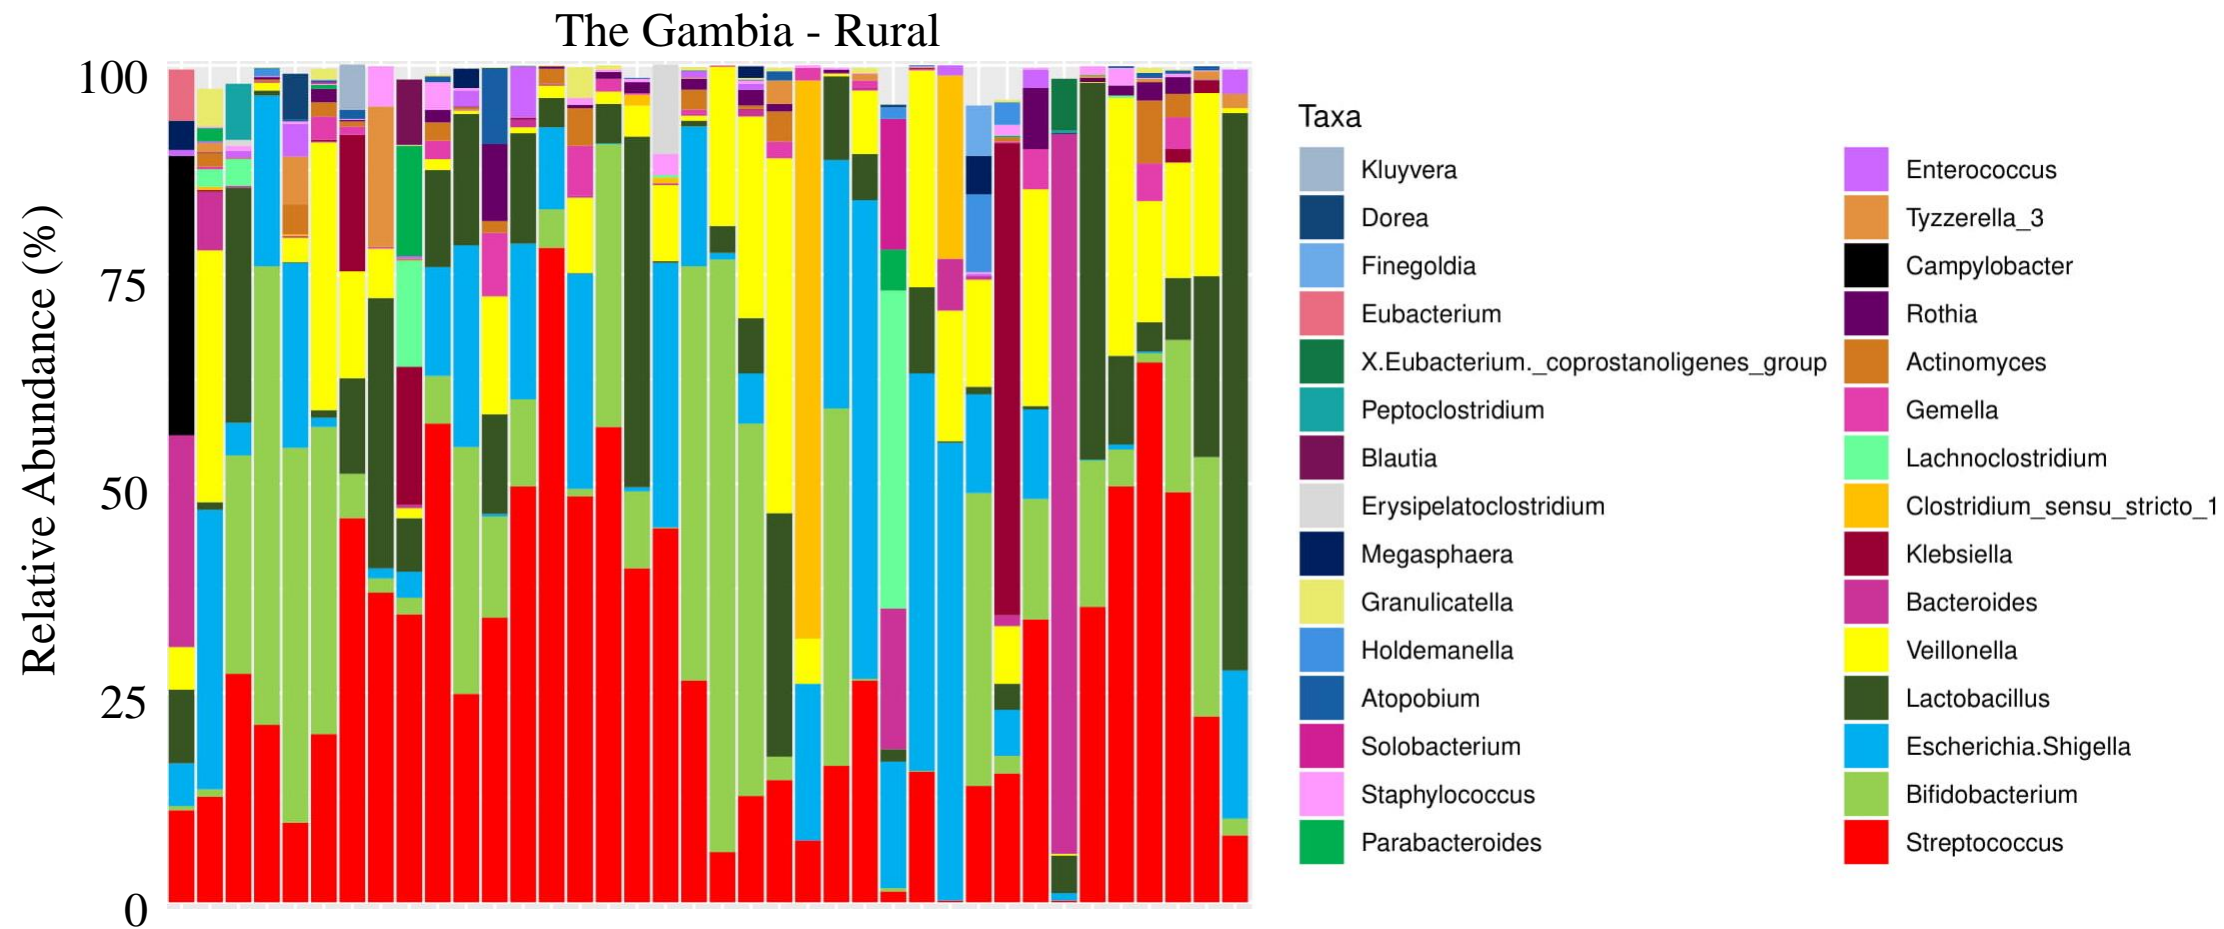

**Supplementary Figure 4.** Relative abundance of the 30 most-abundant genera in infant fecal samples ( $n = 38$ ) collected in urban Gambia. Each bar represents a single sample.

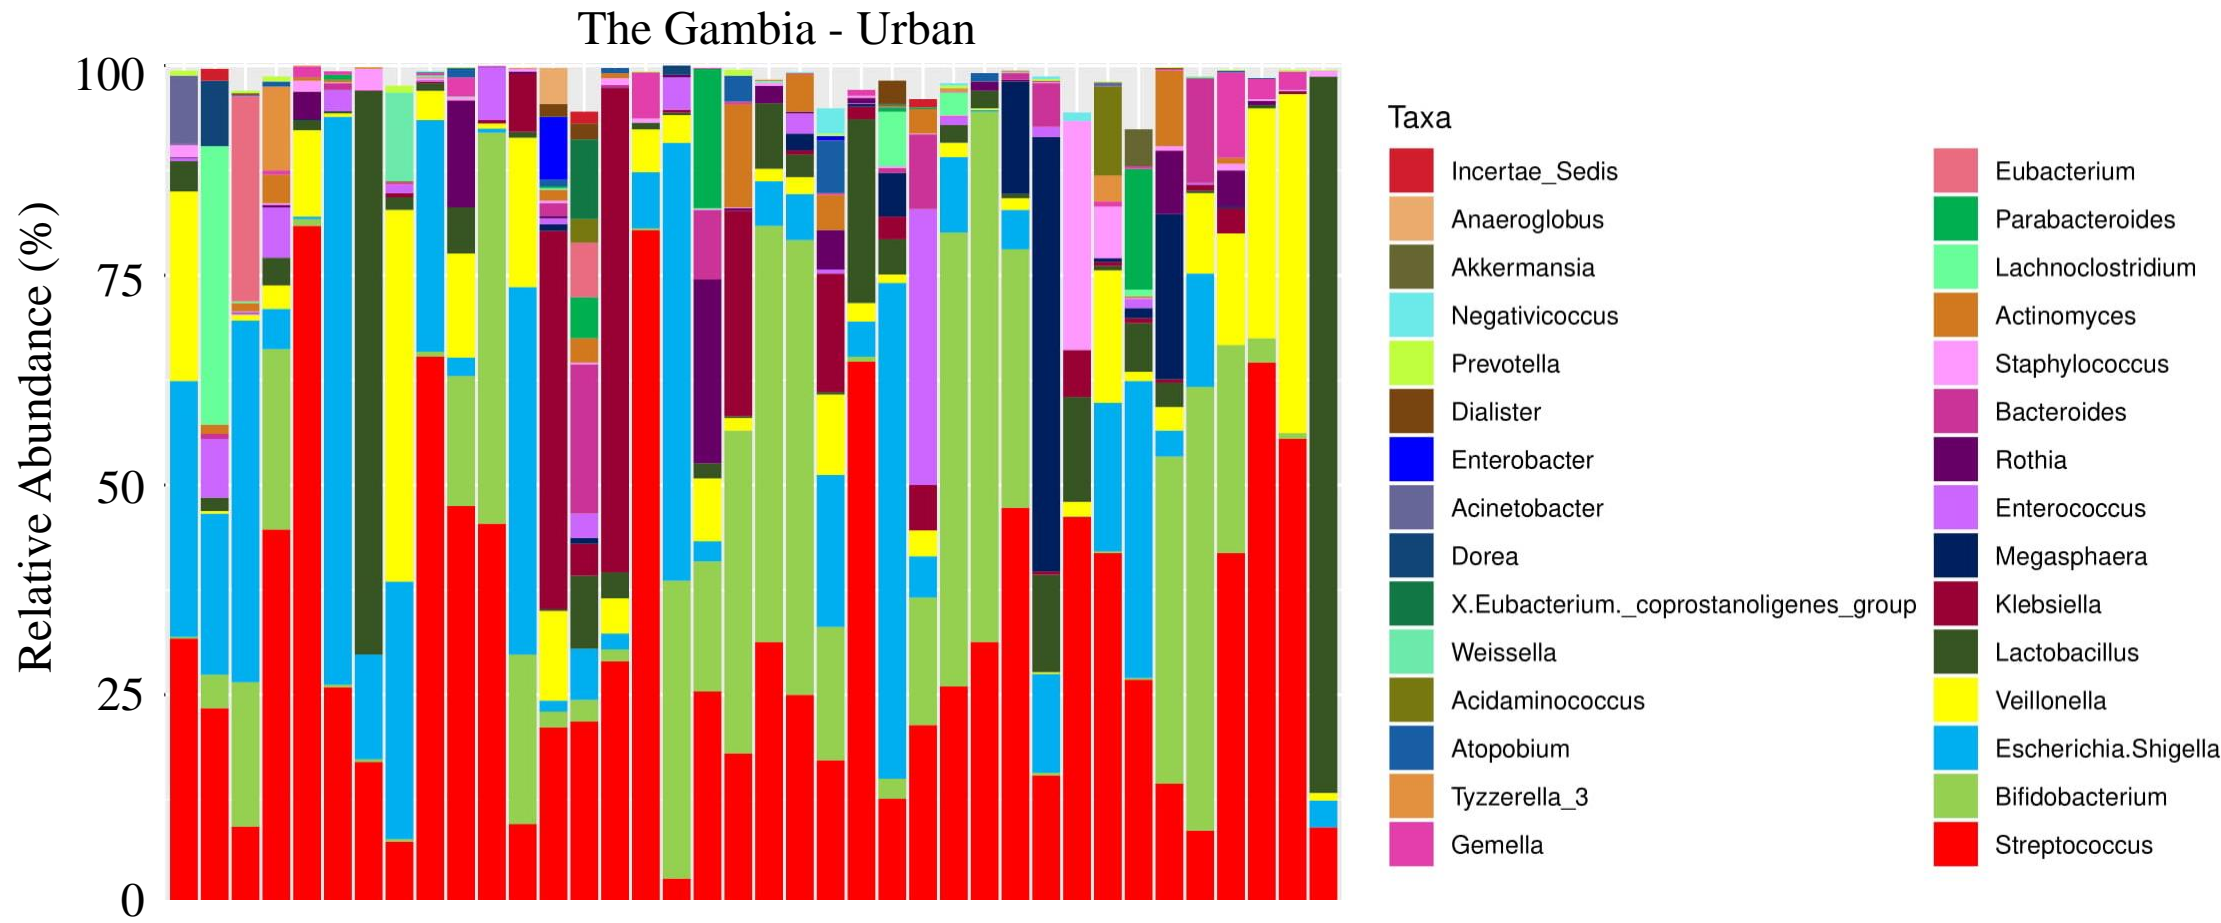

**Supplementary Figure 5.** Relative abundance of the 30 most-abundant genera in infant fecal samples ( $n = 32$ ) collected in Ghana. Each bar represents a single sample.

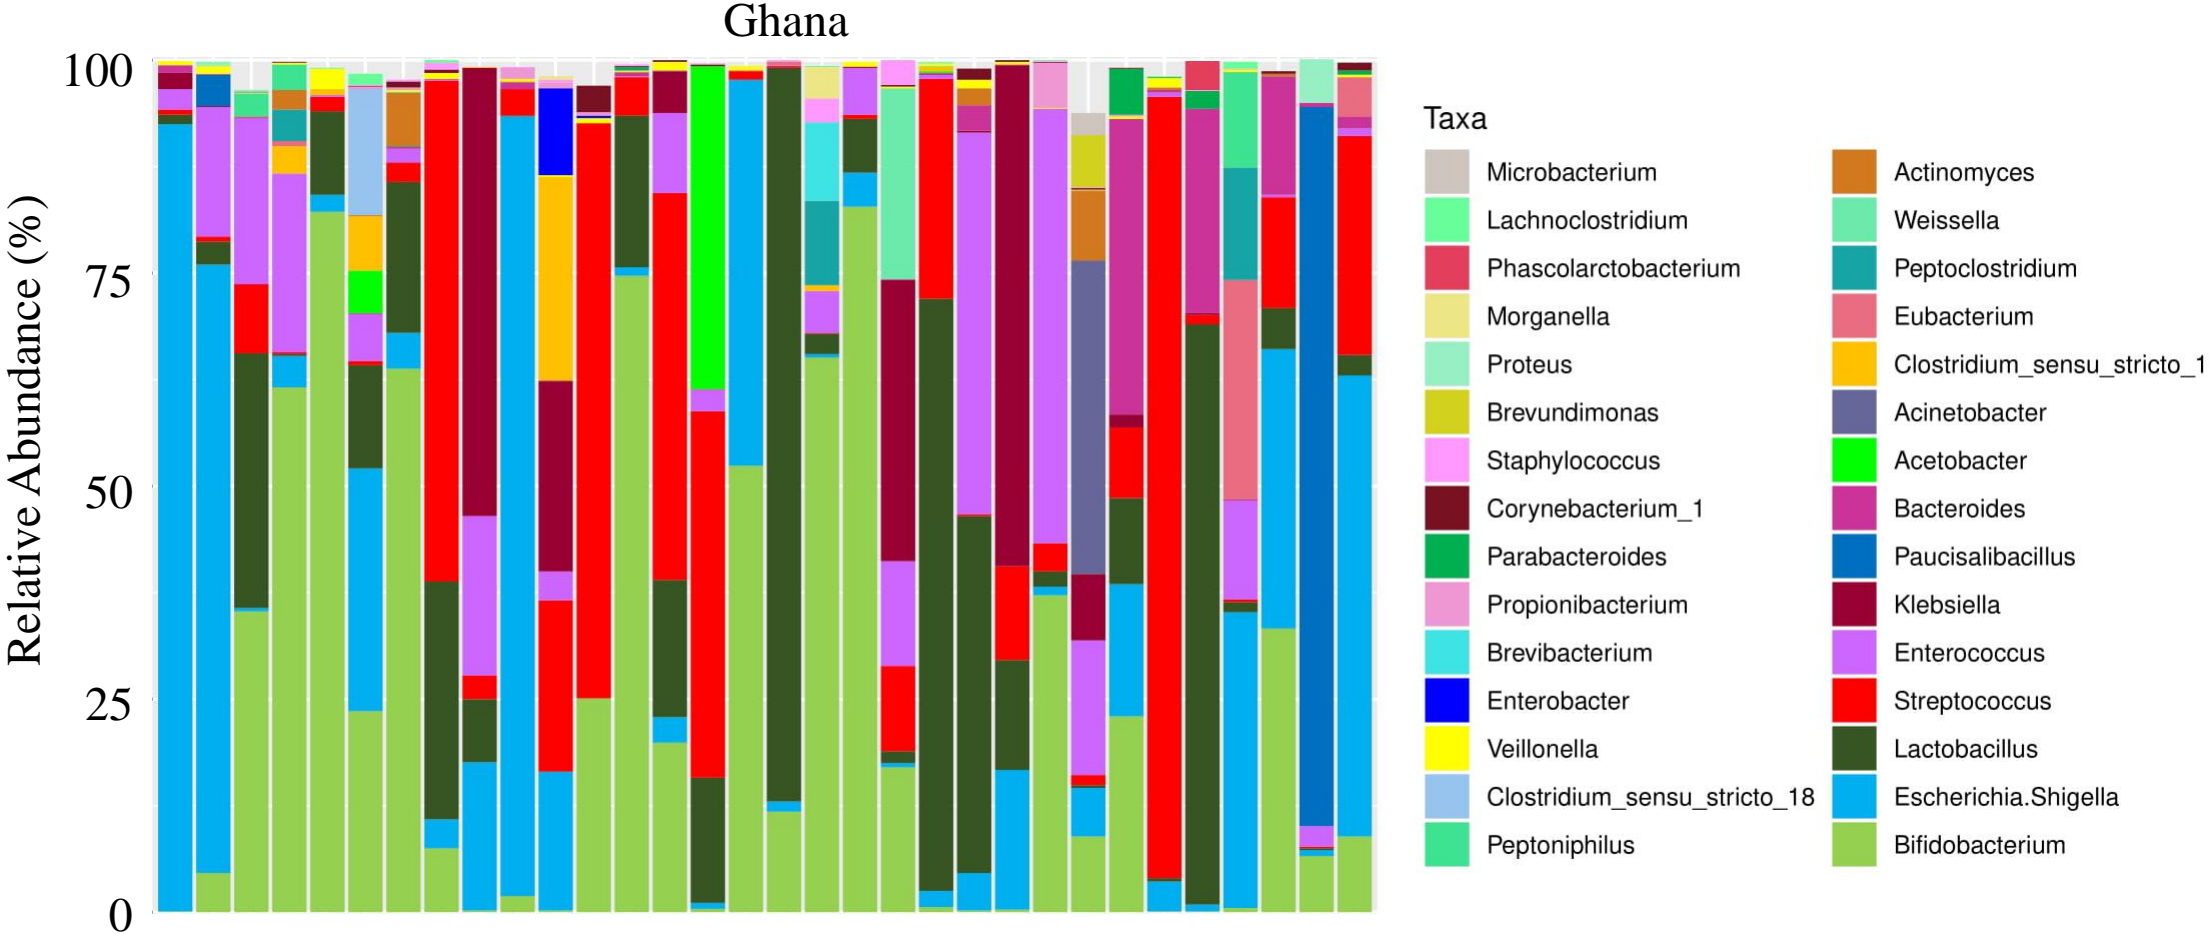



**Supplementary Figure 6.** Relative abundance of the 30 most-abundant genera in infant fecal samples ( $n = 42$ ) collected in Peru. Each bar represents a single sample.

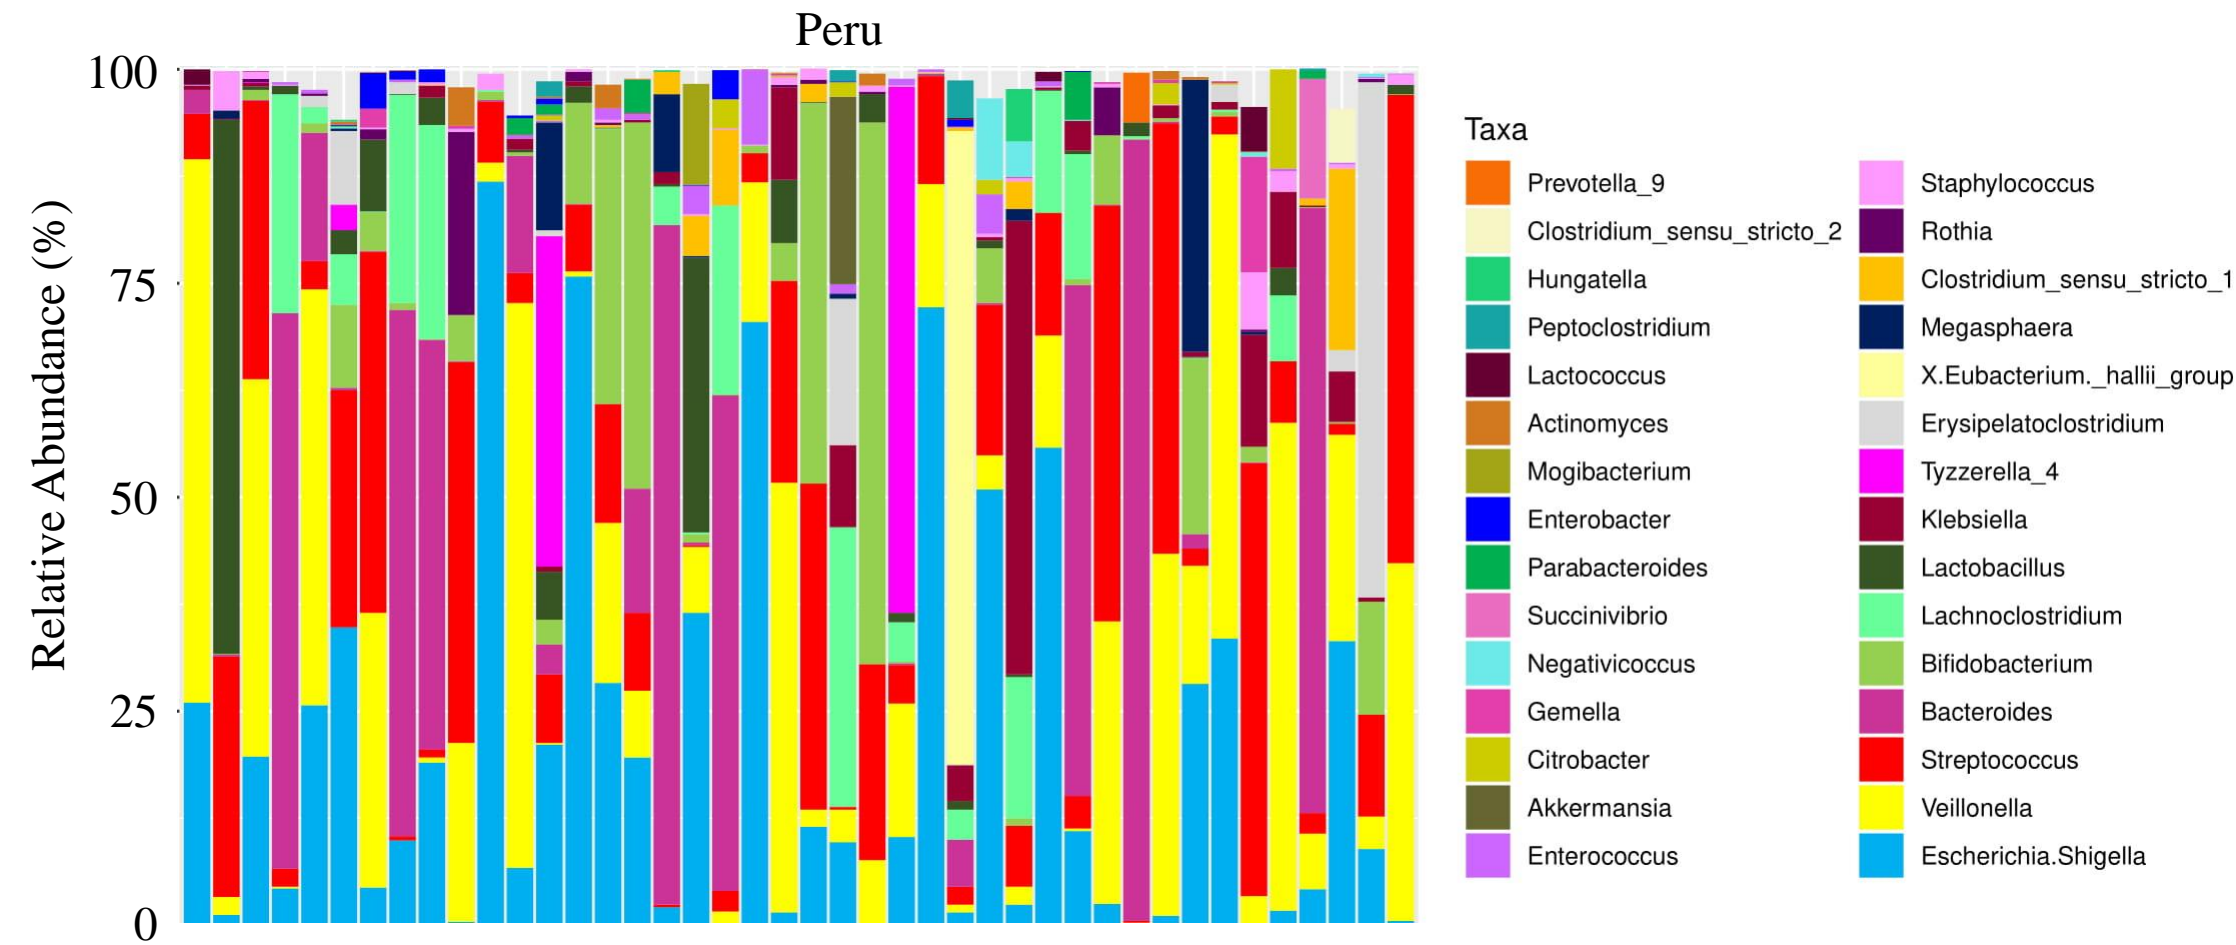

**Supplementary Figure 7.** Relative abundance of the 30 most-abundant genera in infant fecal samples ( $n = 42$ ) collected in Kenya. Each bar represents a single sample.

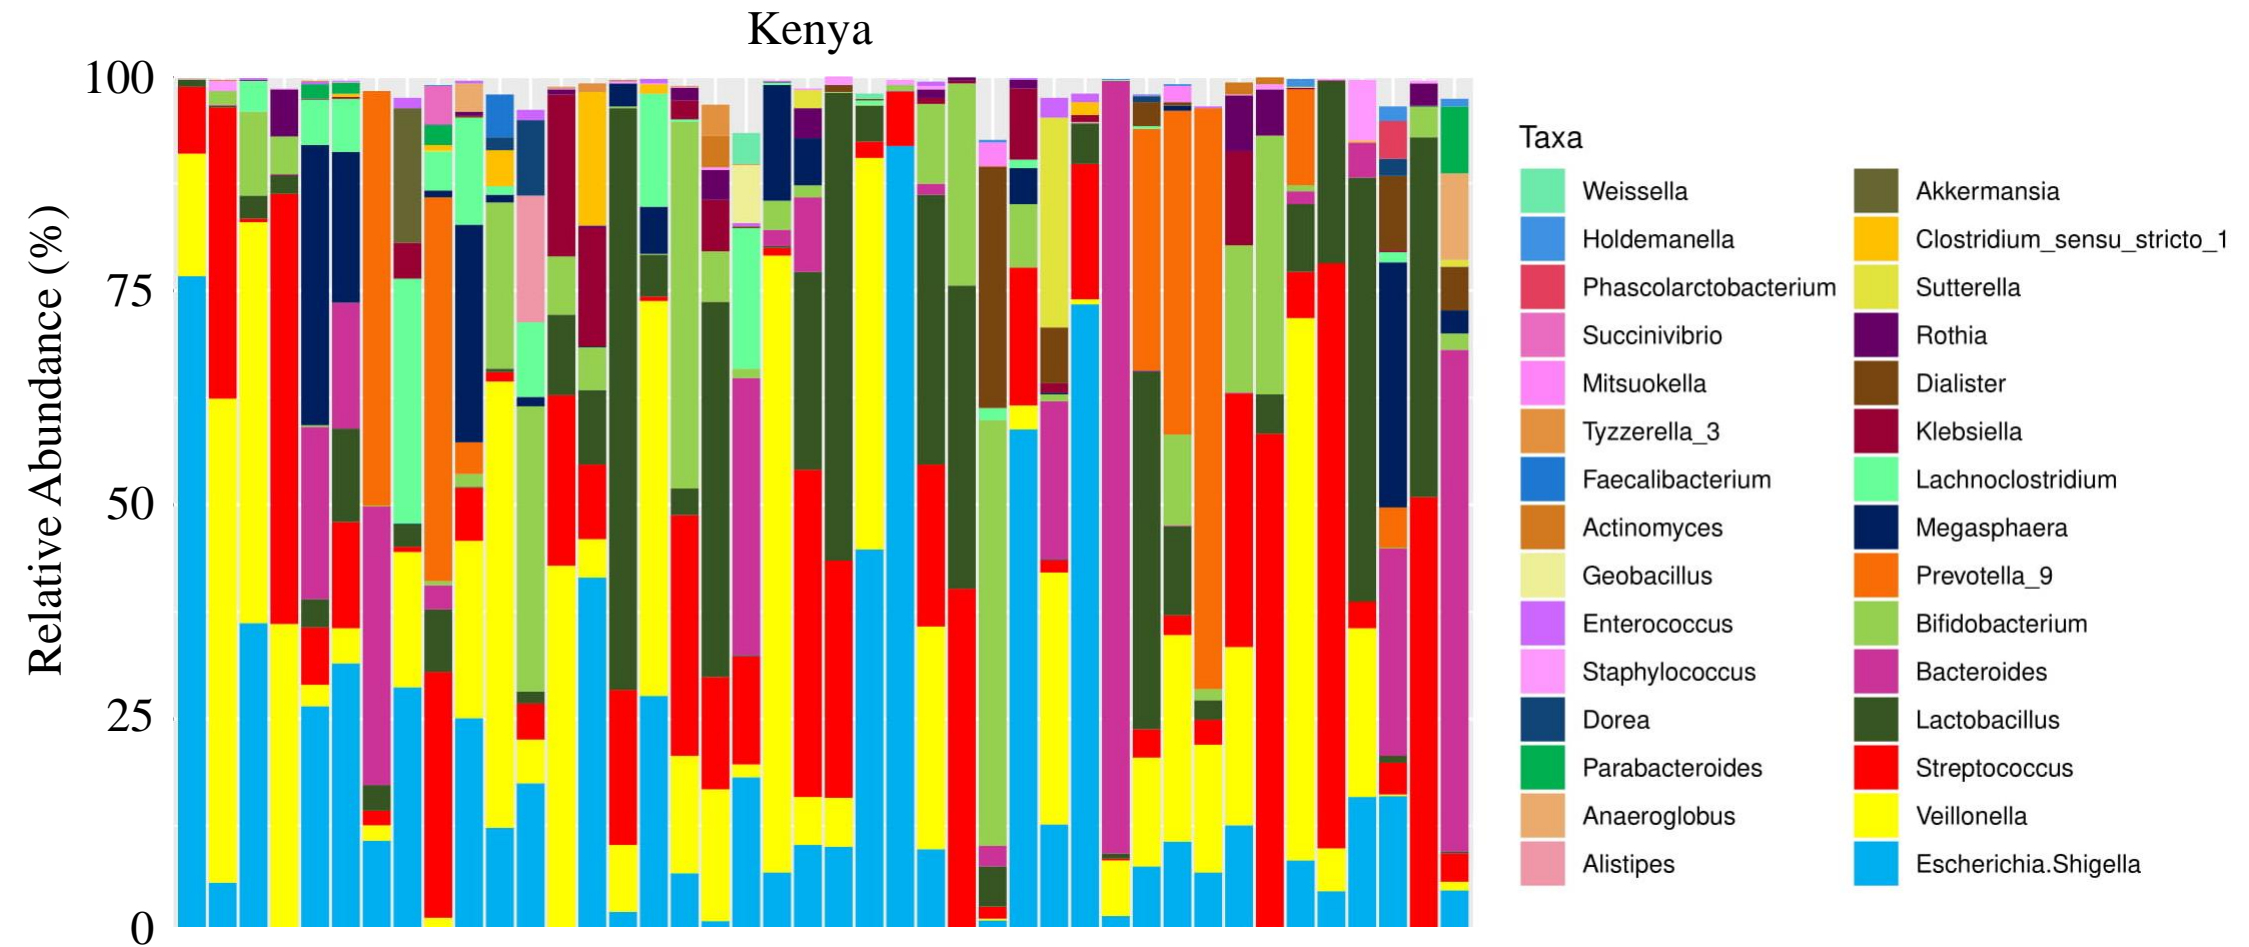

**Supplementary Figure 8.** Relative abundance of the 30 most-abundant genera in infant fecal samples ( $n = 37$ ) collected in Spain. Each bar represents a single sample.

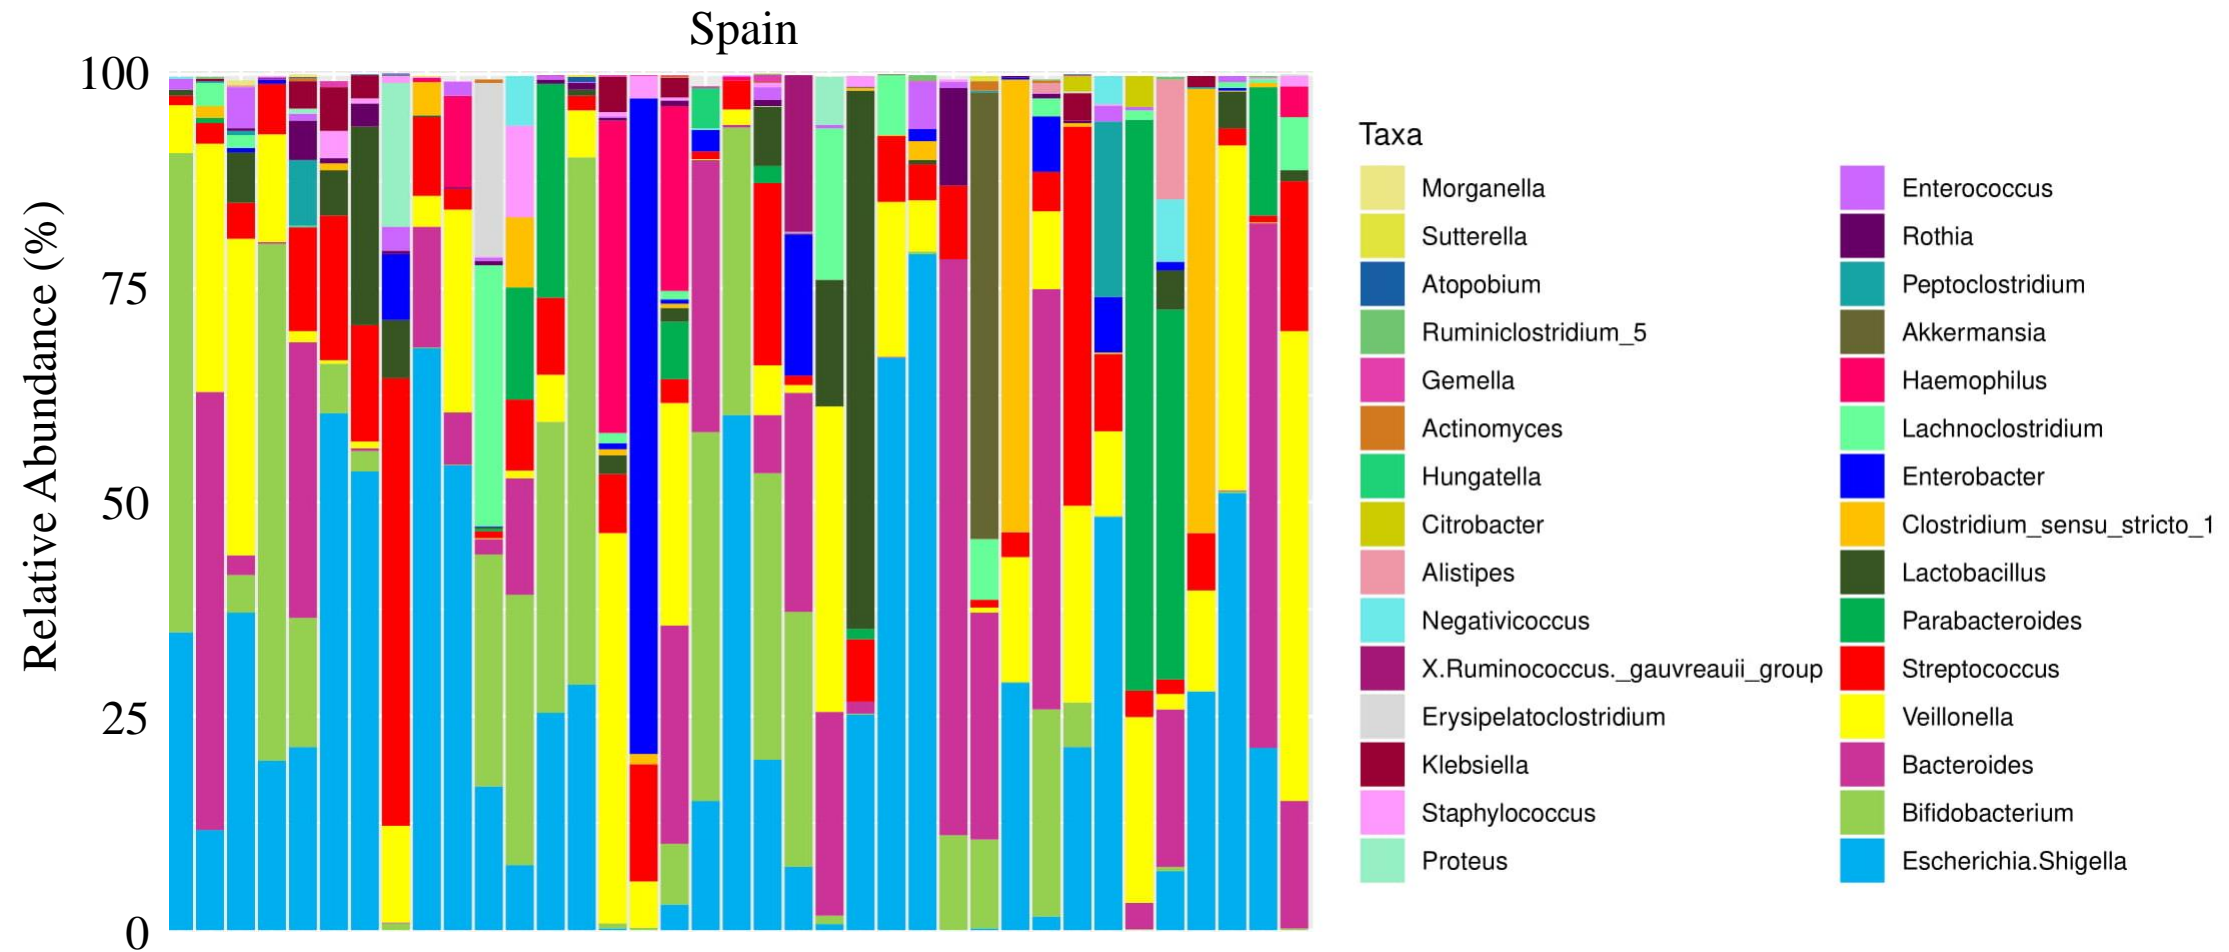



**Supplementary Figure 9.** Relative abundance of the 30 most-abundant genera in infant fecal samples ( $n = 23$ ) collected in Sweden. Each bar represents a single sample.

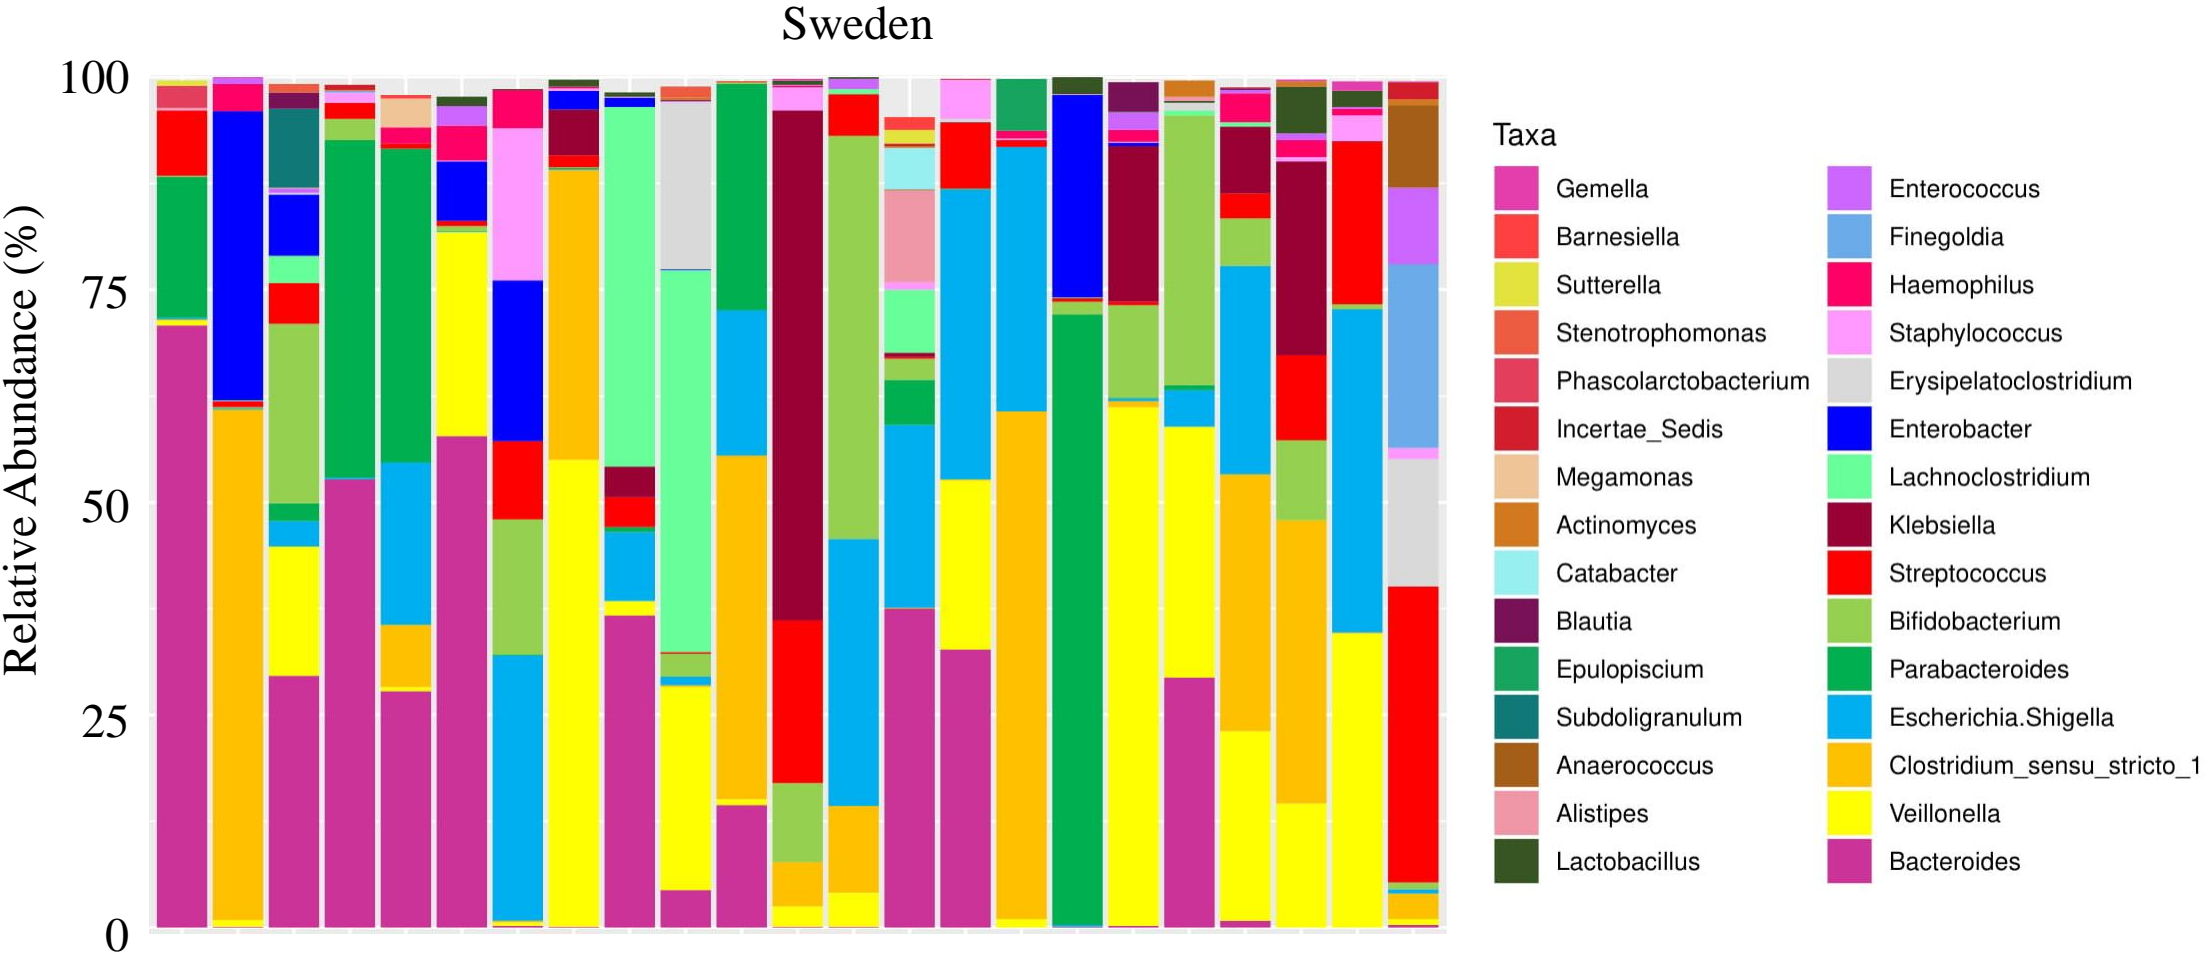

**Supplementary Figure 10.** Relative abundance of the 30 most-abundant genera in infant fecal samples ( $n = 12$ ) collected in US California. Each bar represents a single sample.

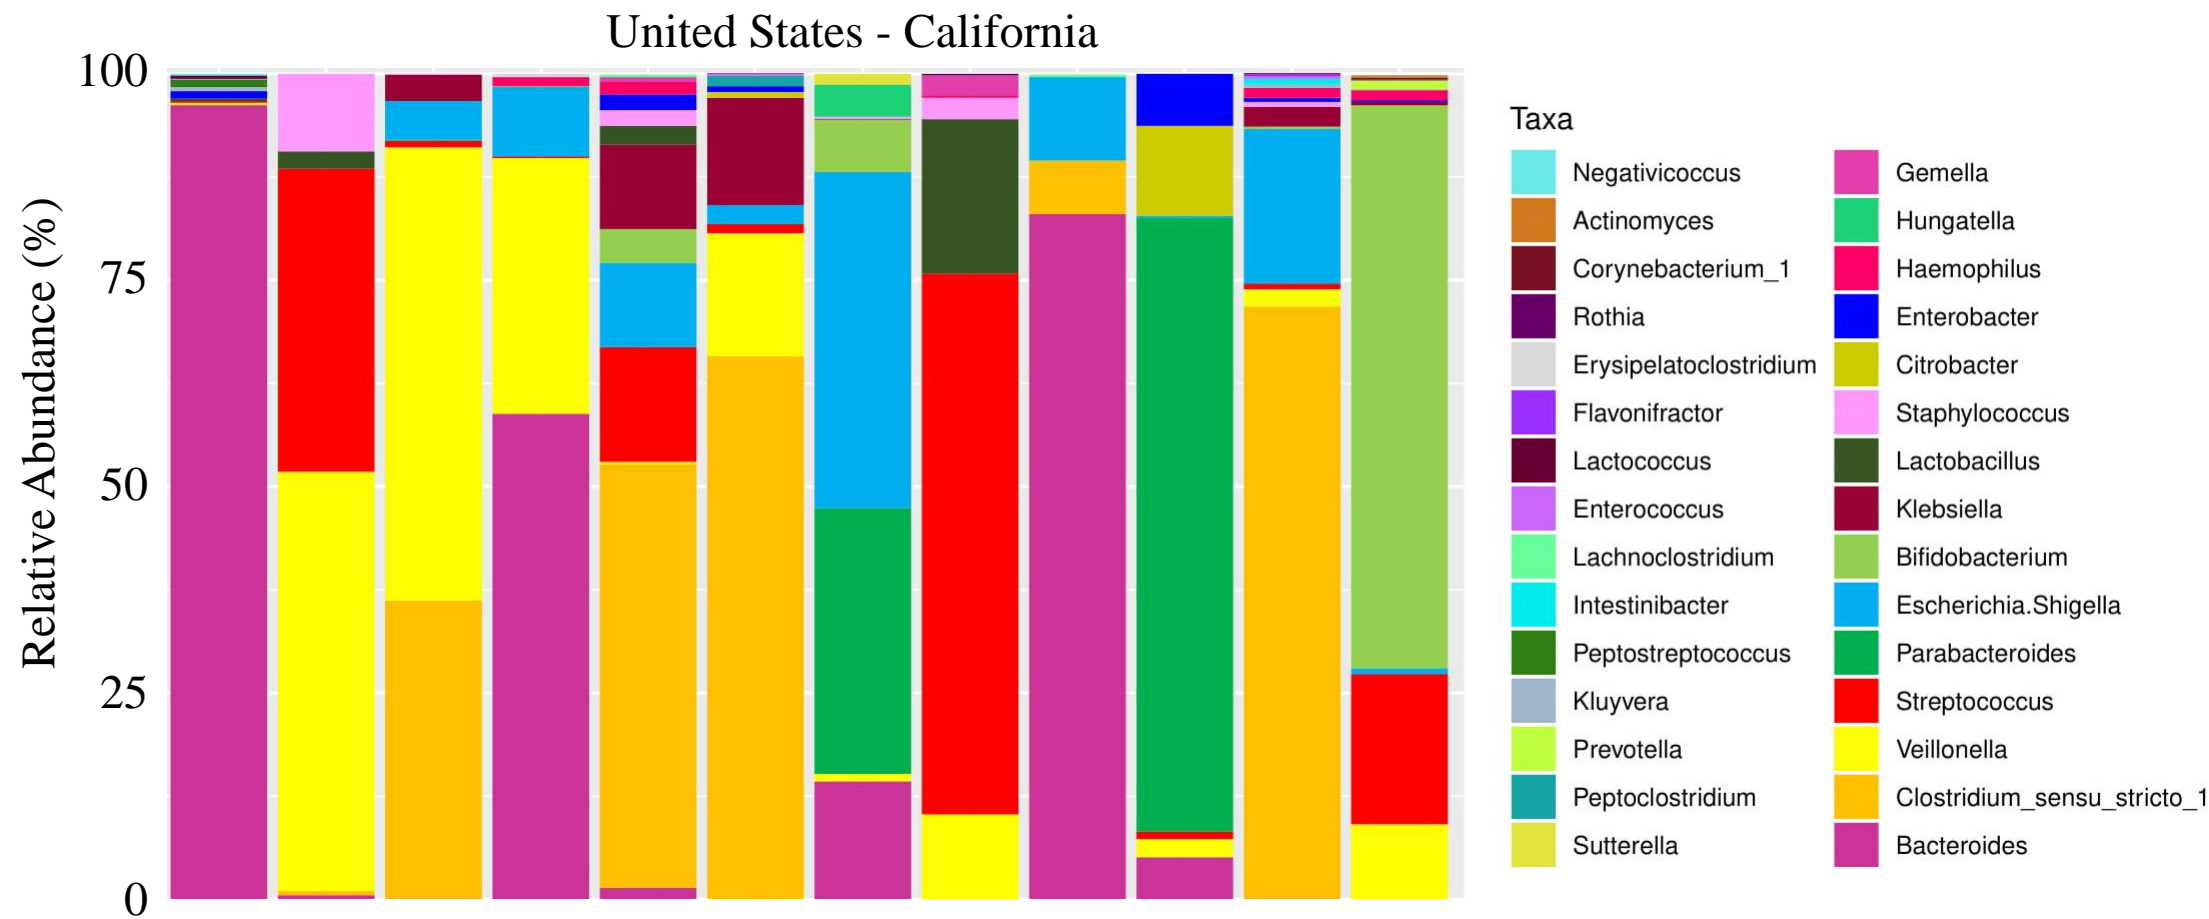

**Supplementary Figure 11.** Relative abundance of the 30 most-abundant genera in infant fecal samples ( $n = 41$ ) collected in US Washington. Each bar represents a single sample.

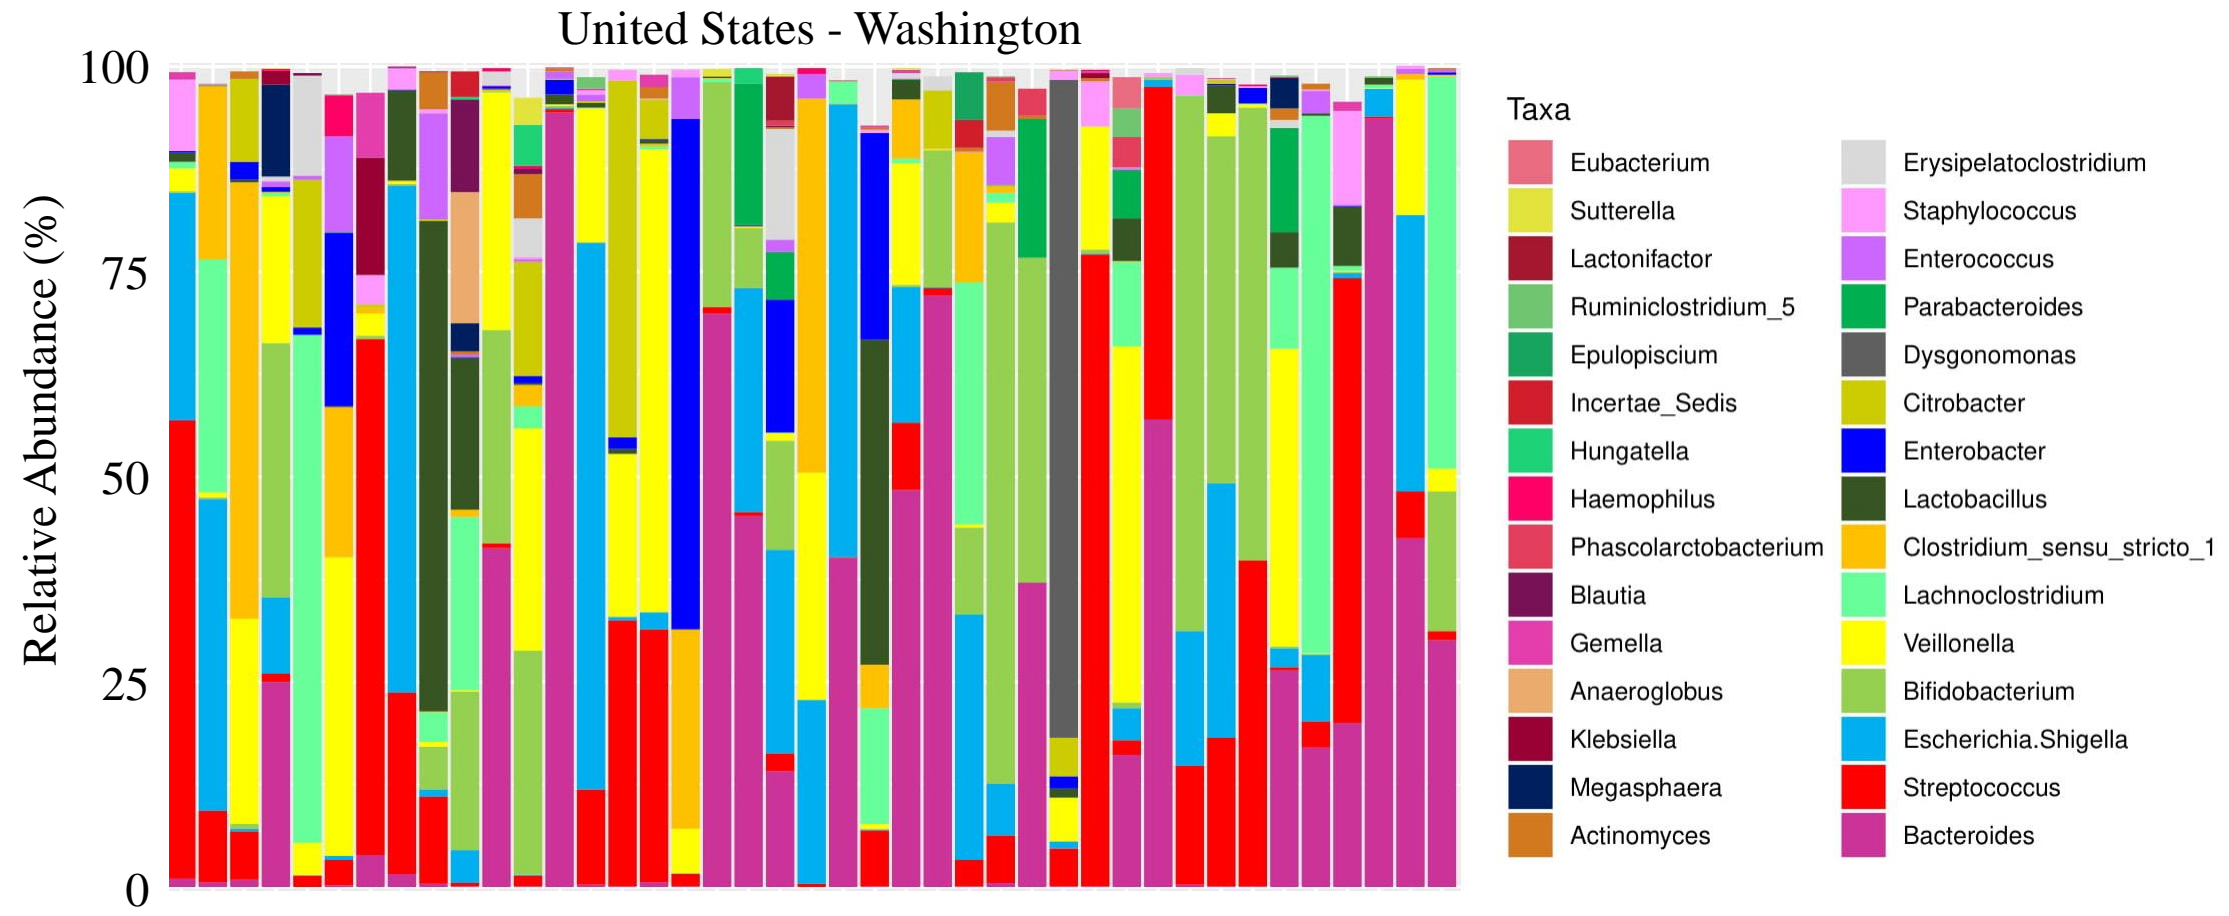

**Supplementary Figure 12.** Non-metric multidimensional scaling (NMDS) plot visualizing the Bray-Curtis distance by cohort for infant feces (A) and milk (B). Ellipses represent 95% confidence intervals for each cohort.

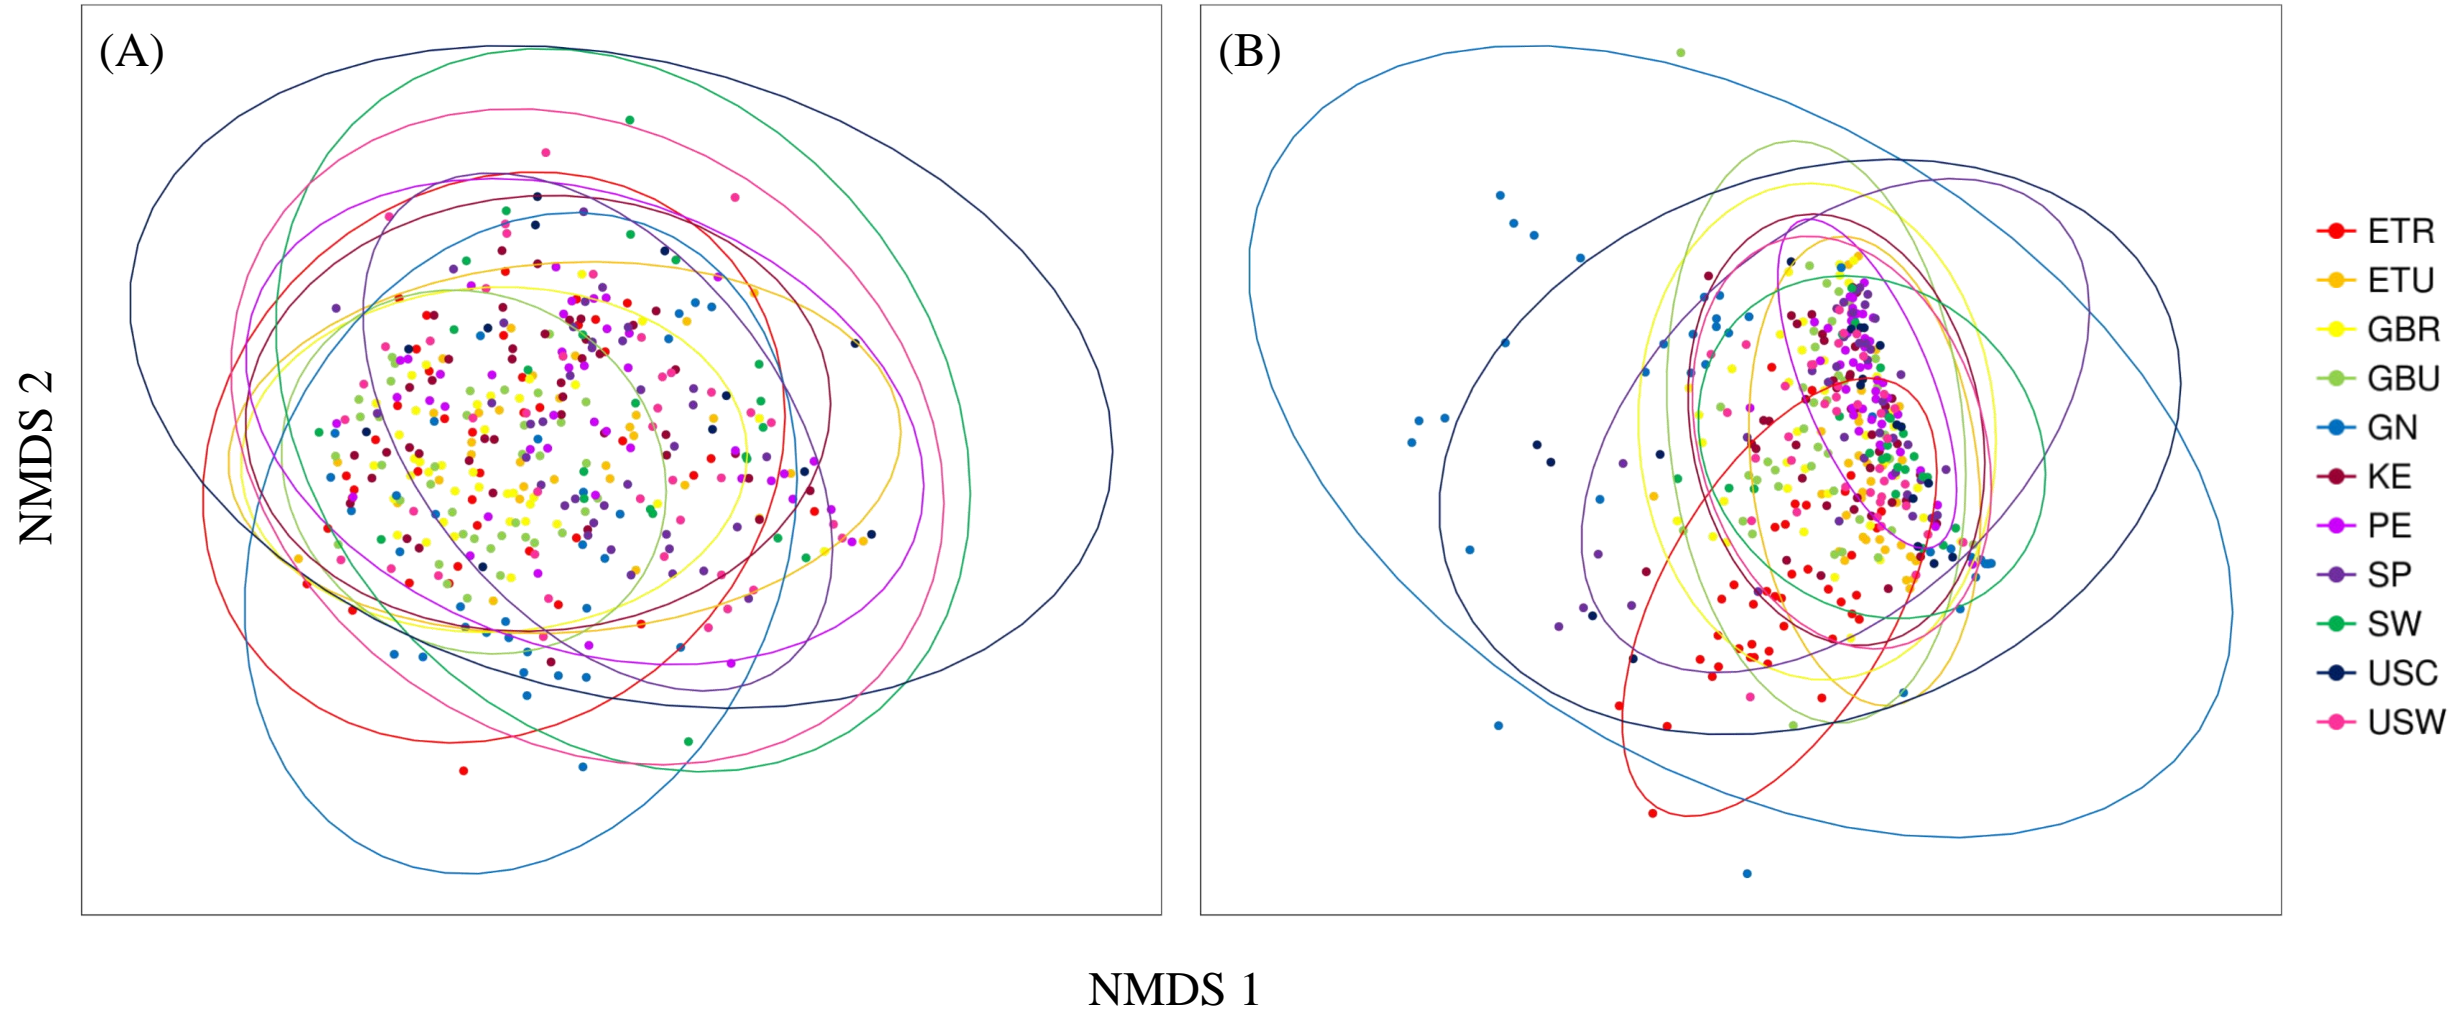

**Supplementary Figure 13.** Venn diagram showing genera present in at least 90% of samples (core taxa) for each cohort and the overall dataset (“overall”;  $n = 377$  for infant feces,  $n = 394$  for milk). Abbreviations: ETU, urban Ethiopia; ETR, rural Ethiopia; GBU, urban Gambia; GBR, rural Gambia; GN, Ghana; KE, Kenya; SP, Spain; SW, Sweden; PE, Peru; California (United States), USC; Washington (United States), USW.

Infant Feces

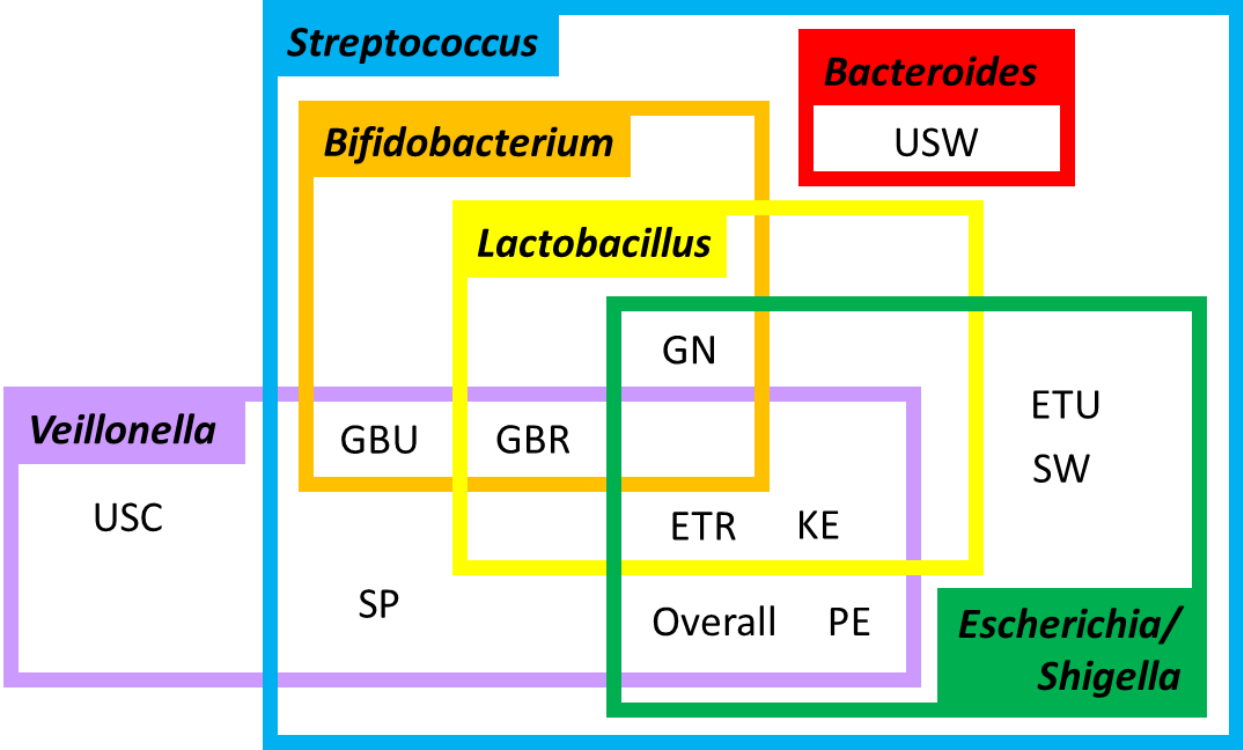

Milk

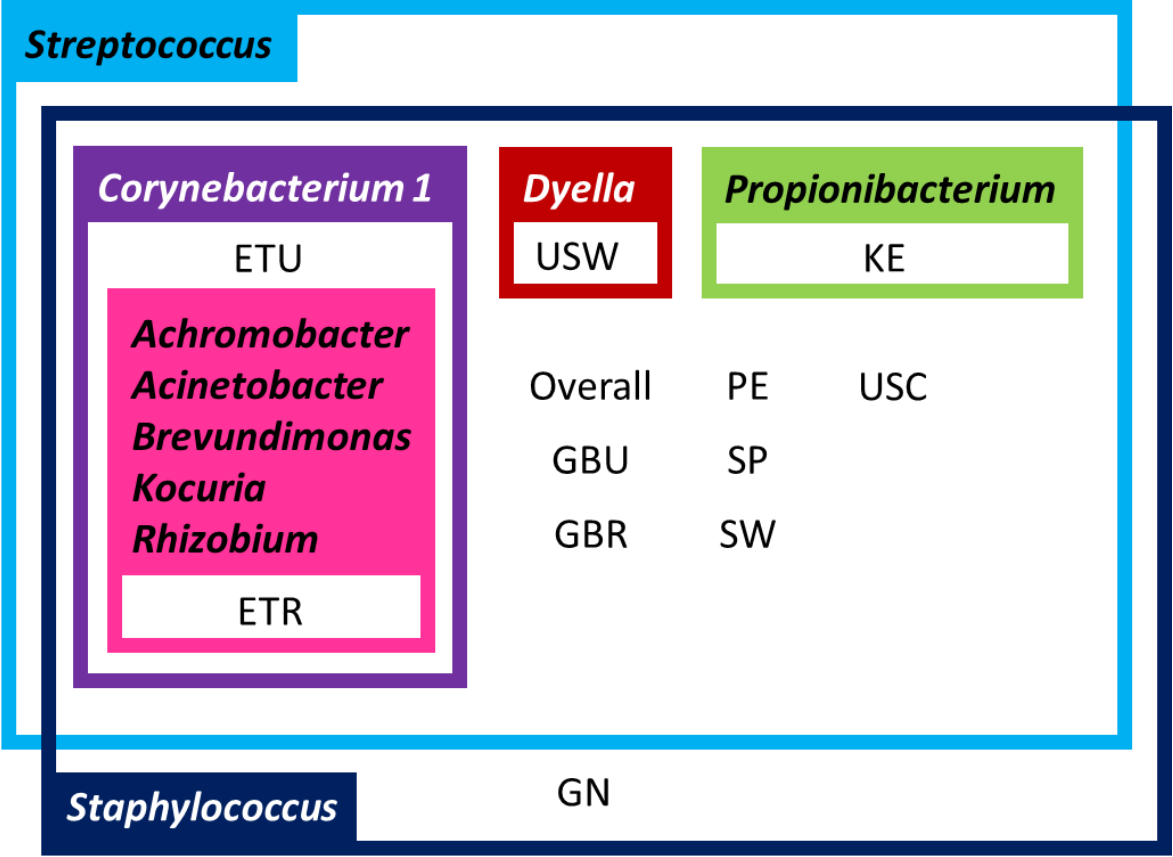



**Supplementary Figure 14.** Relative abundance of the 30 most-abundant genera in milk samples ( $n = 40$ ) collected in rural Ethiopia. Each bar represents a single sample.

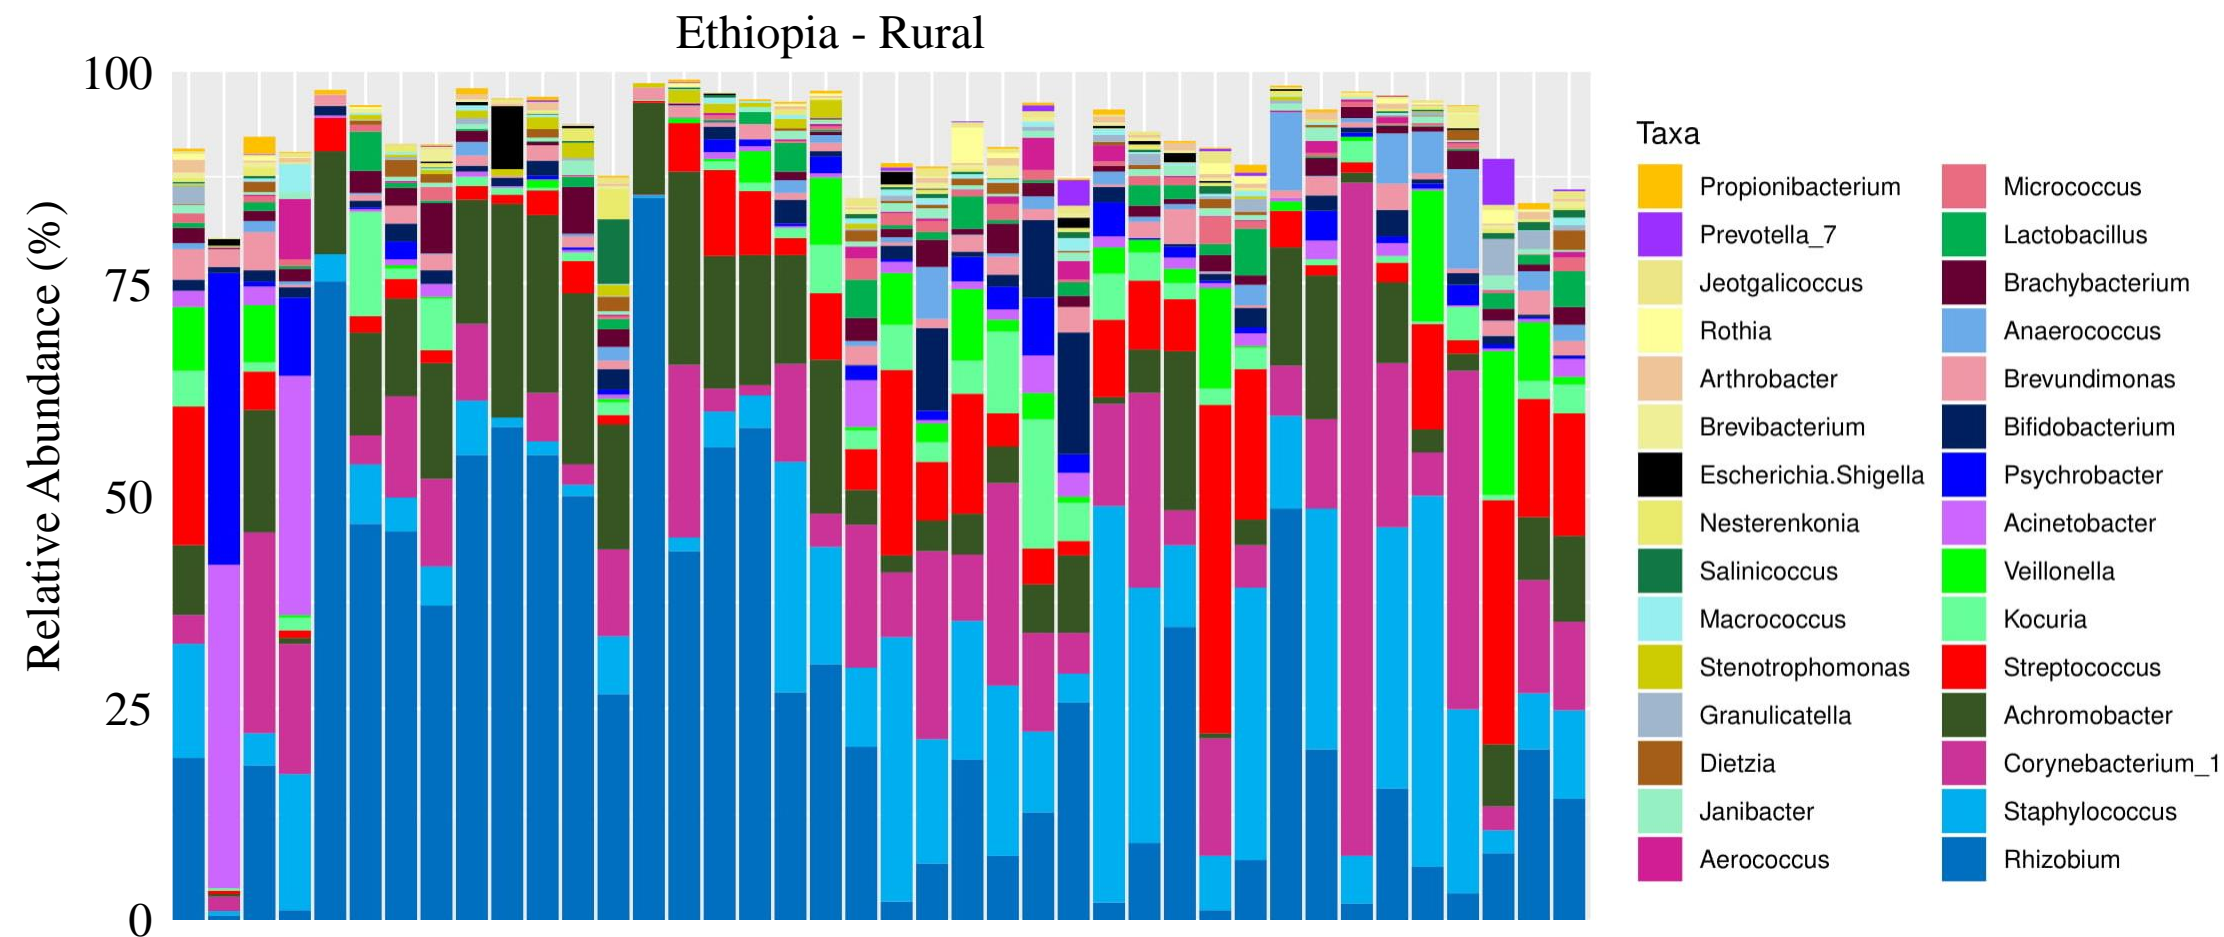

**Supplementary Figure 15.** Relative abundance of the 30 most-abundant genera in milk samples ( $n = 34$ ) collected in urban Ethiopia. Each bar represents a single sample.

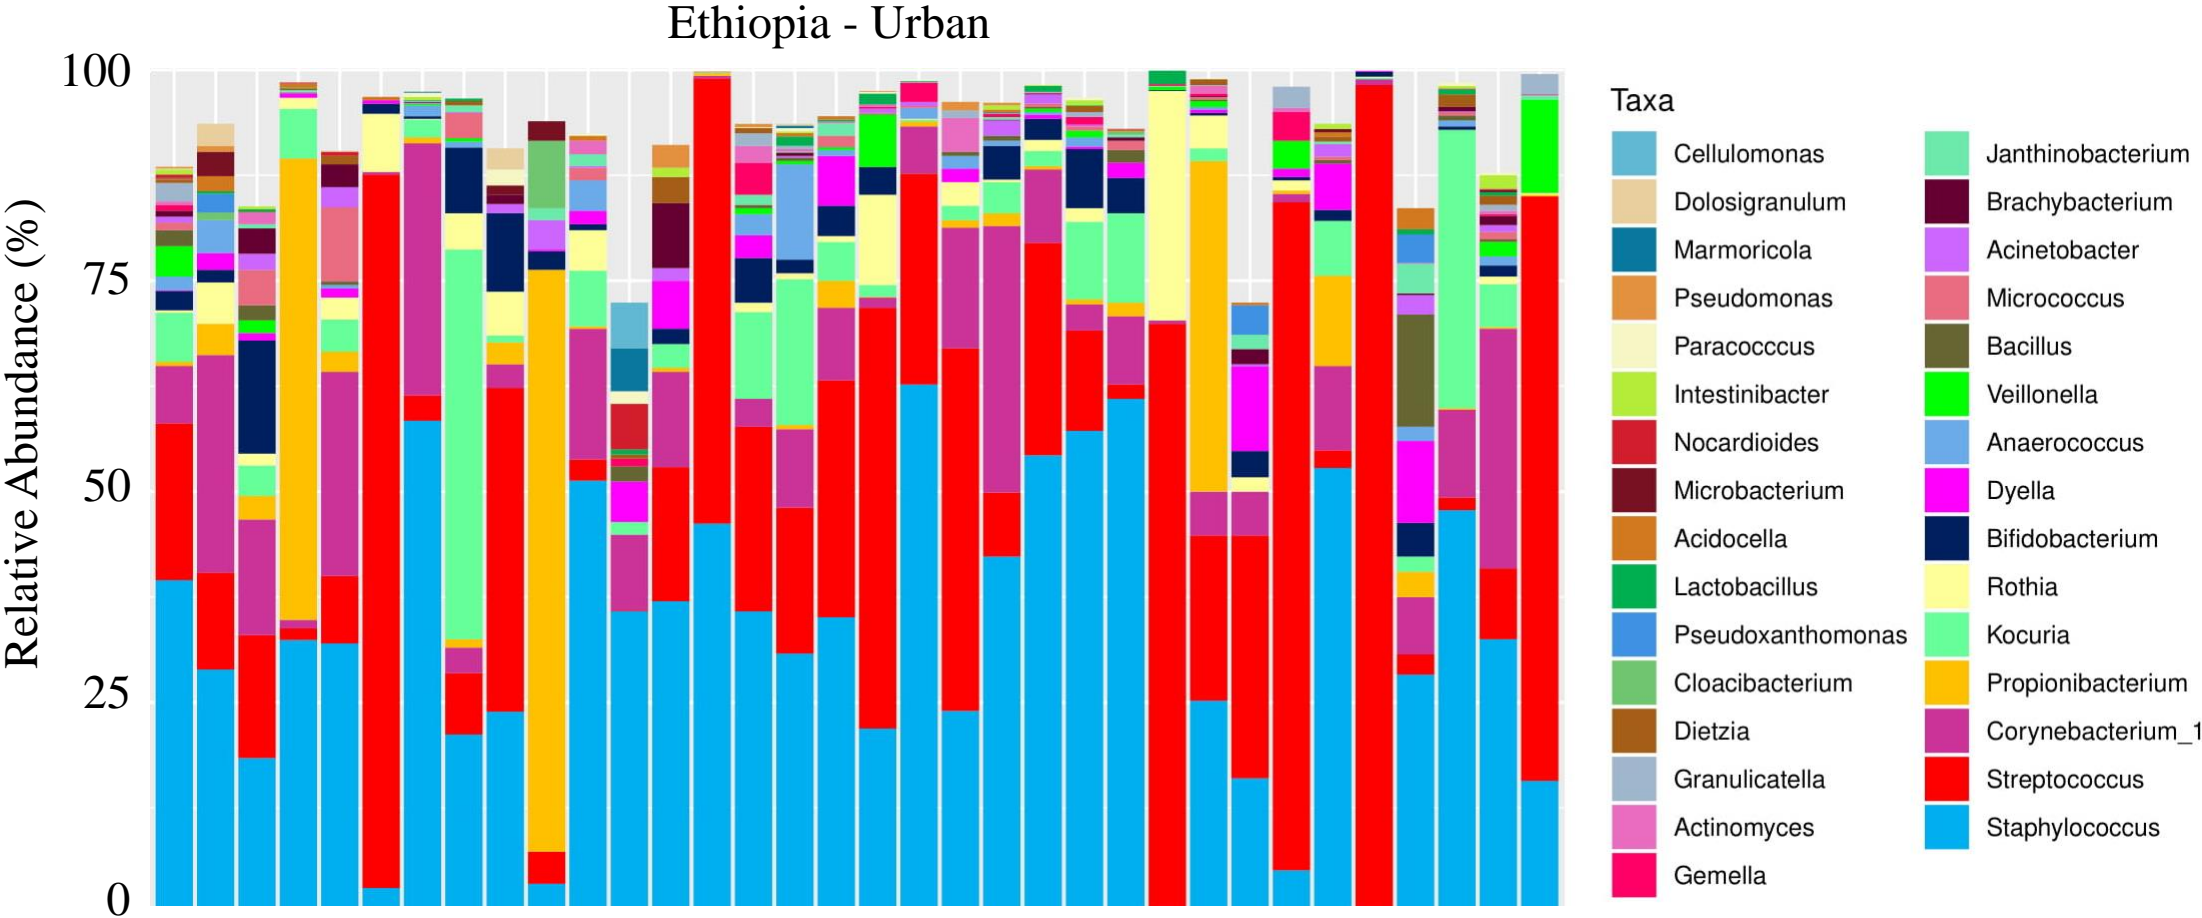

**Supplementary Figure 16.** Relative abundance of the 30 most-abundant genera in milk samples ( $n = 39$ ) collected in rural Gambia. Each bar represents a single sample.

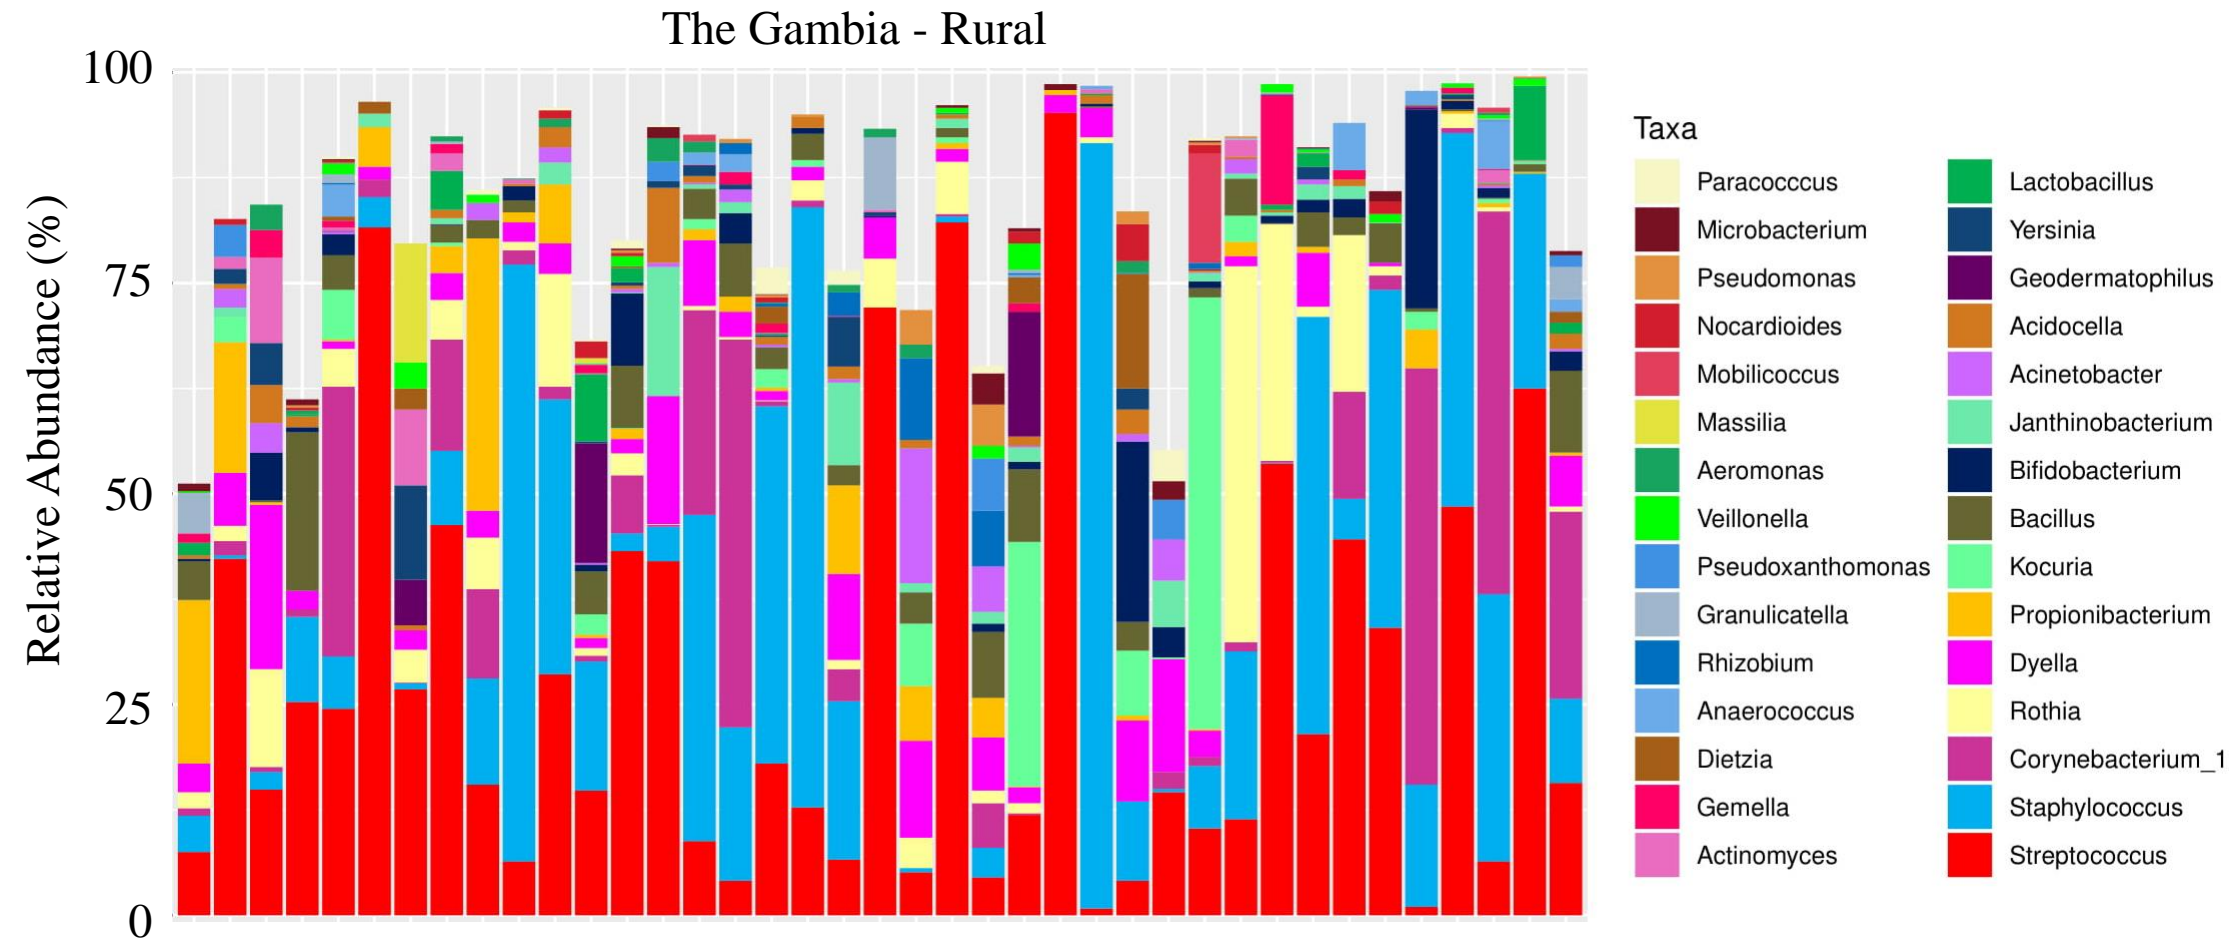

**Supplementary Figure 17.** Relative abundance of the 30 most-abundant genera in milk samples ( $n = 38$ ) collected in urban Gambia. Each bar represents a single sample.

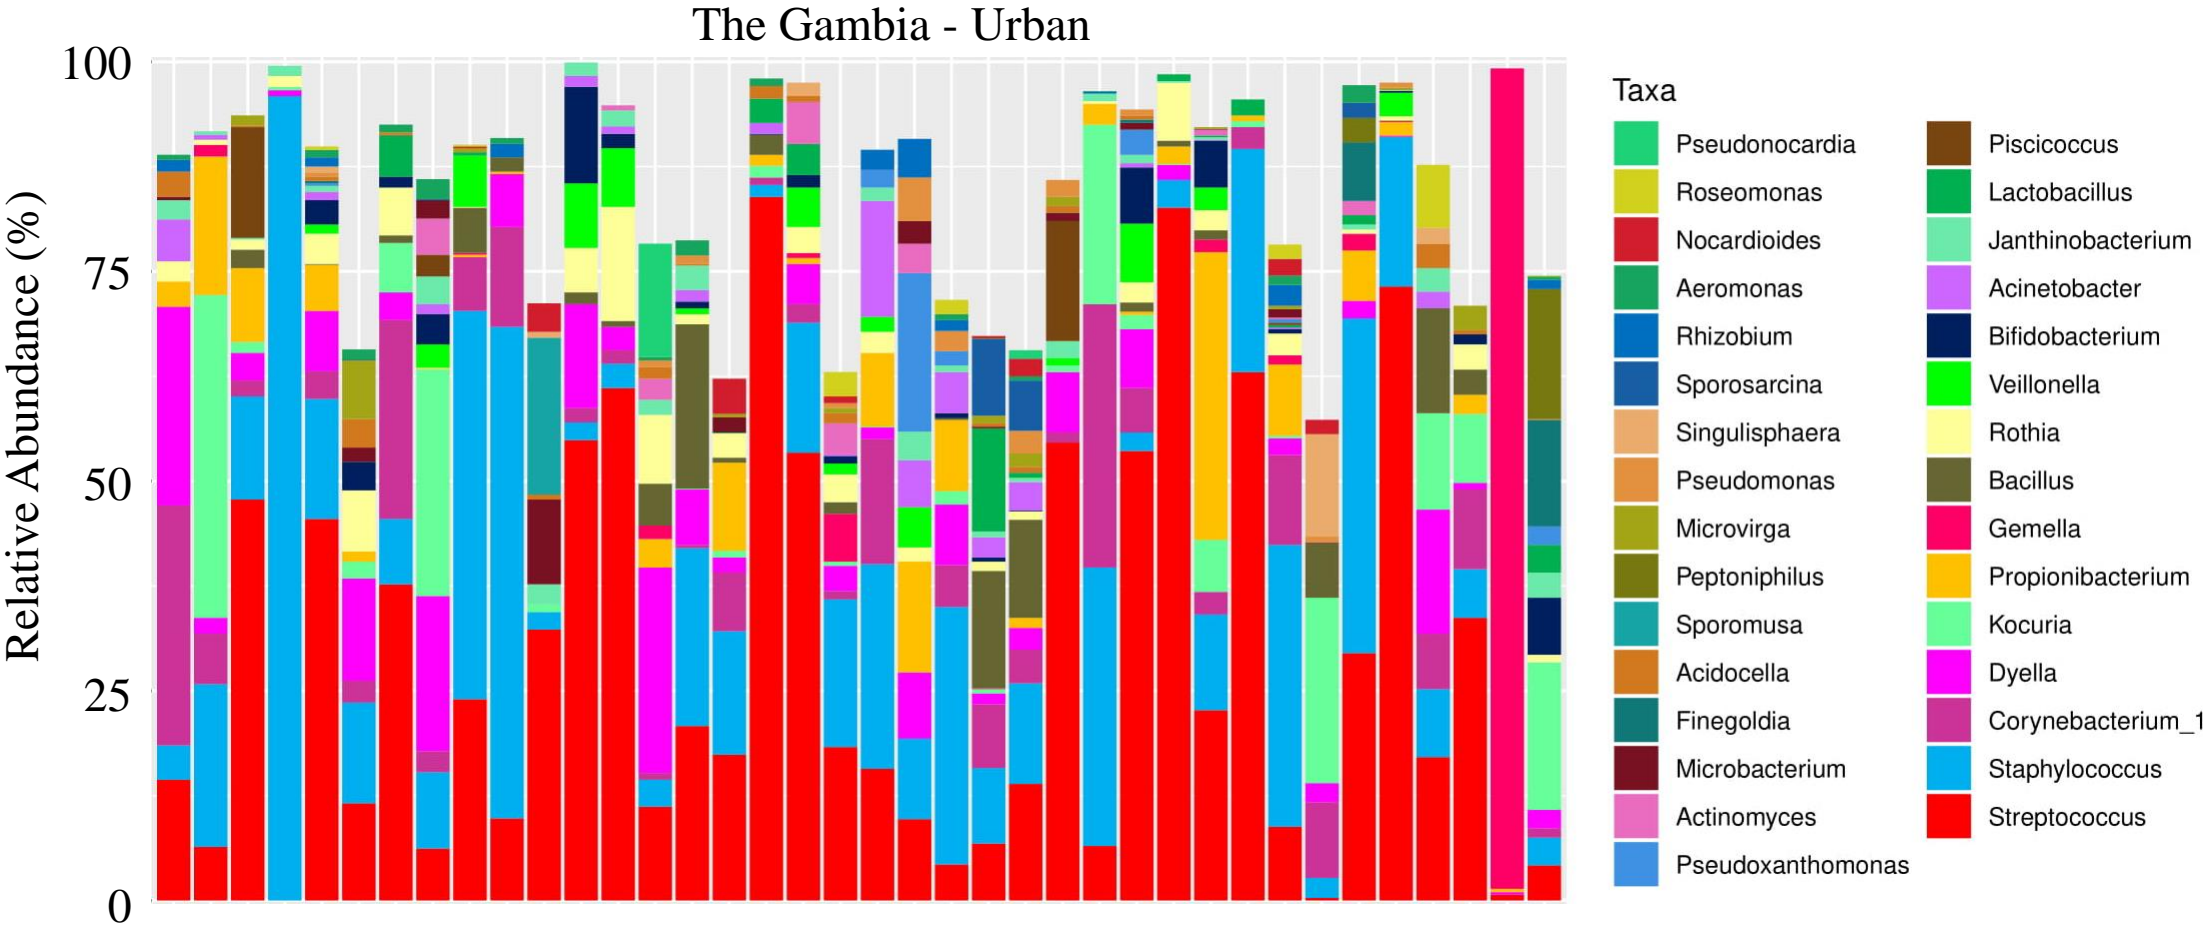

**Supplementary Figure 18.** Relative abundance of the 30 most-abundant genera in milk samples ( $n = 37$ ) collected in Ghana. Each bar represents a single sample.

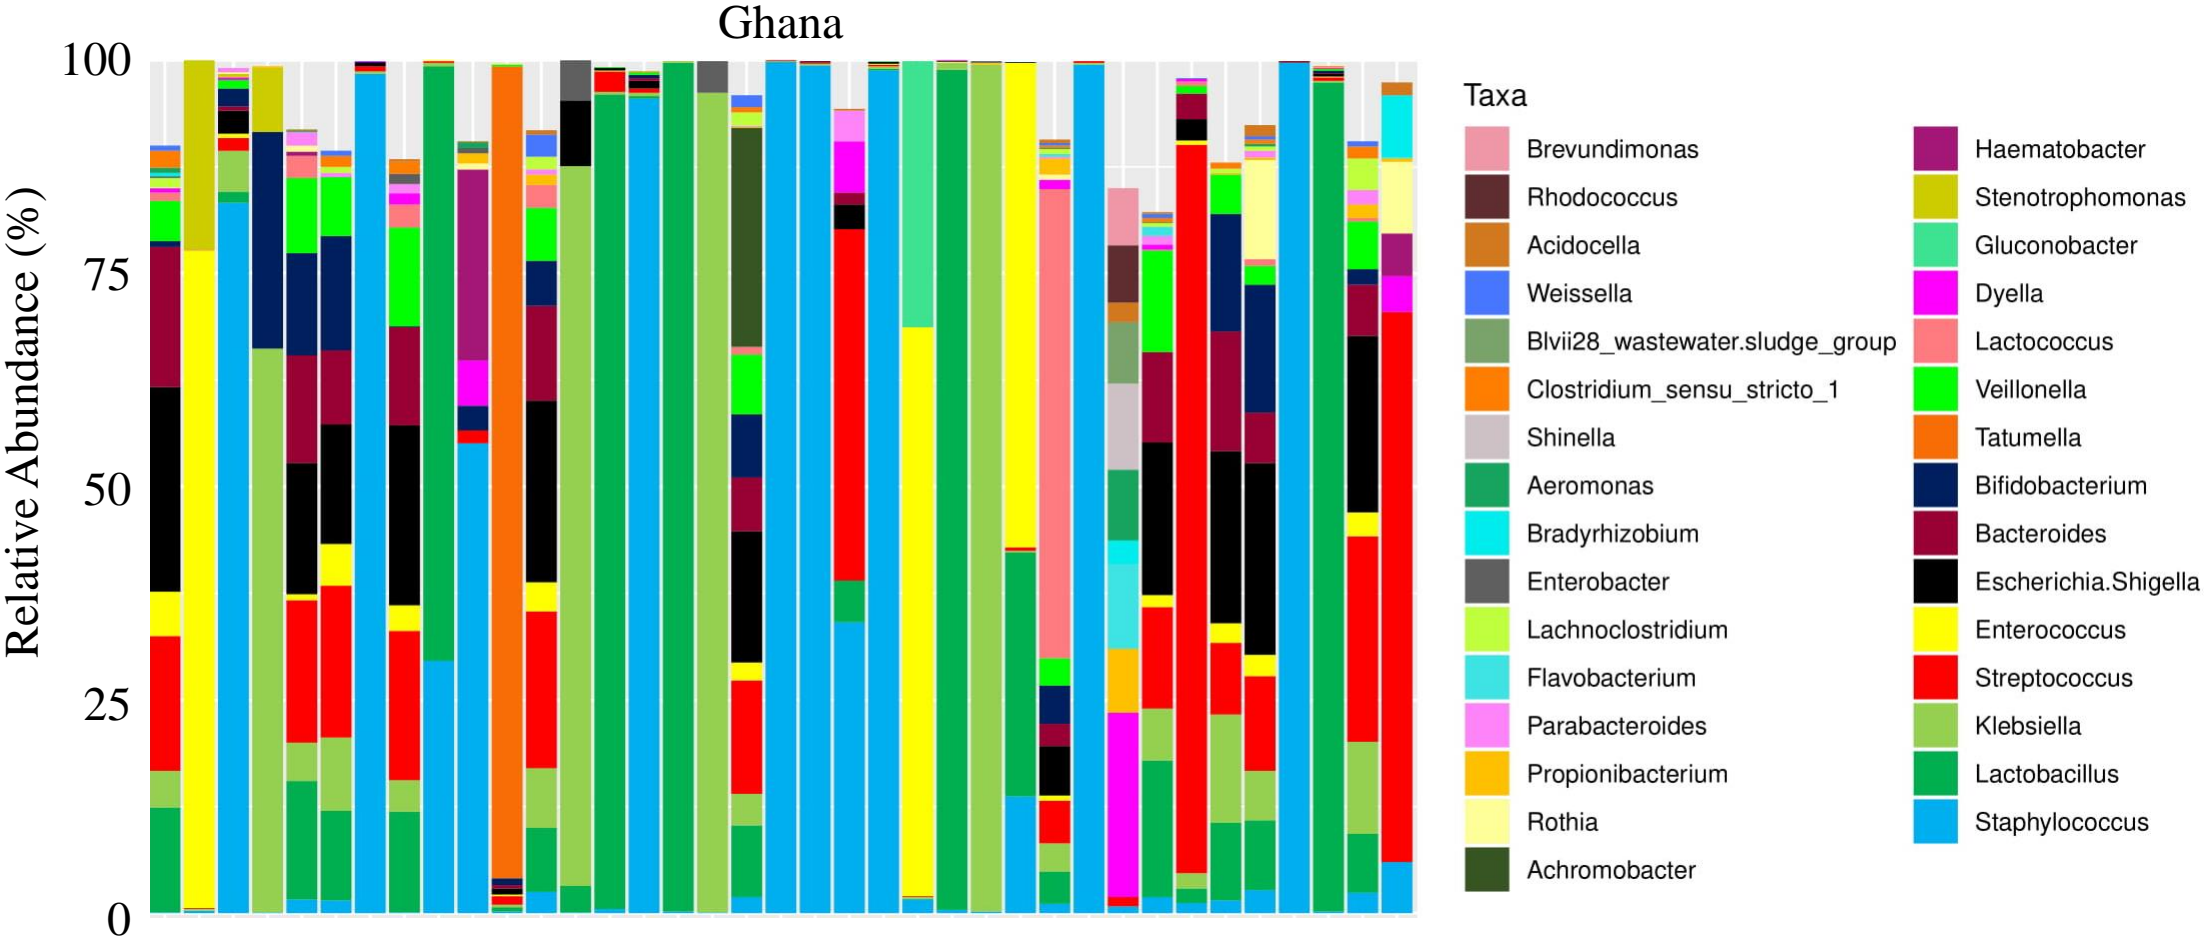



**Supplementary Figure 19.** Relative abundance of the 30 most-abundant genera in milk samples ( $n = 43$ ) collected in Peru. Each bar represents a single sample.

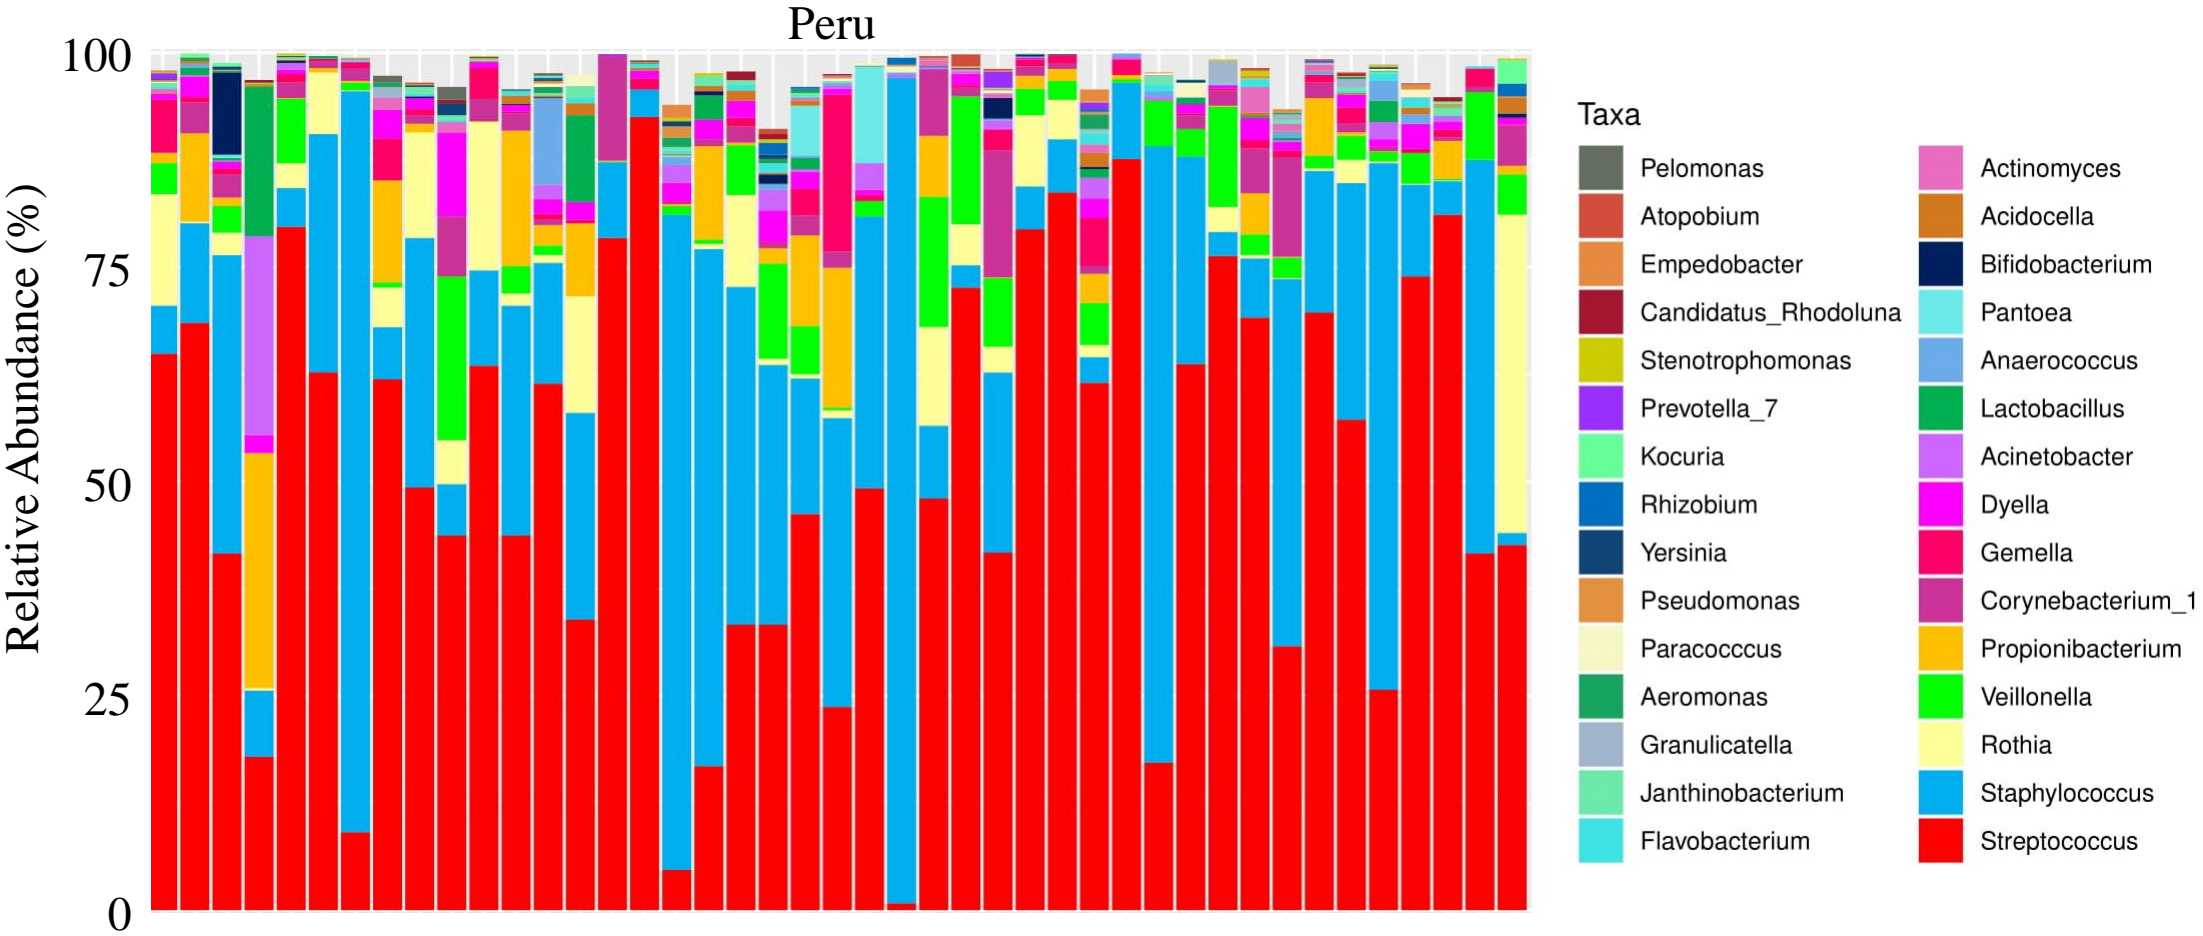

**Supplementary Figure 20.** Relative abundance of the 30 most-abundant genera in milk samples ( $n = 42$ ) collected in Kenya. Each bar represents a single sample.

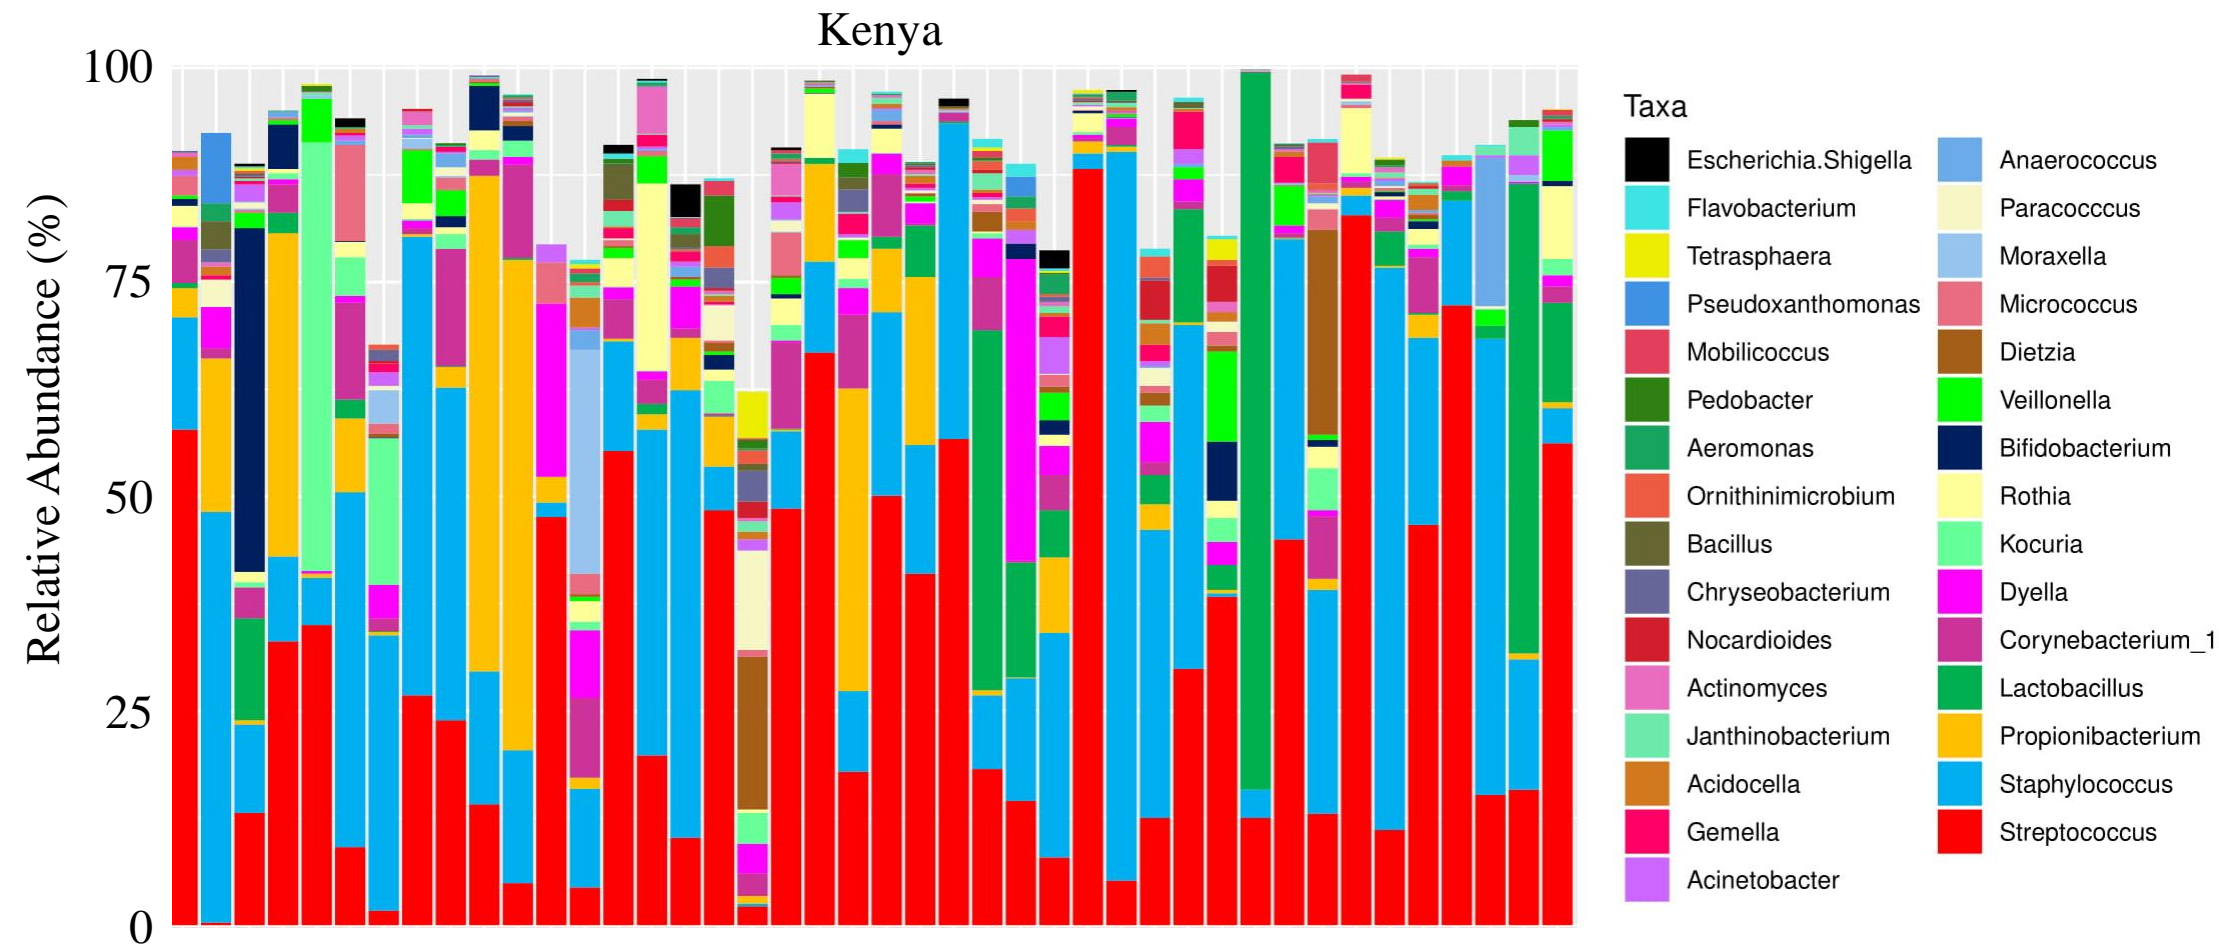

**Supplementary Figure 21.** Relative abundance of the 30 most-abundant genera in milk samples ( $n = 40$ ) collected in Spain. Each bar represents a single sample.

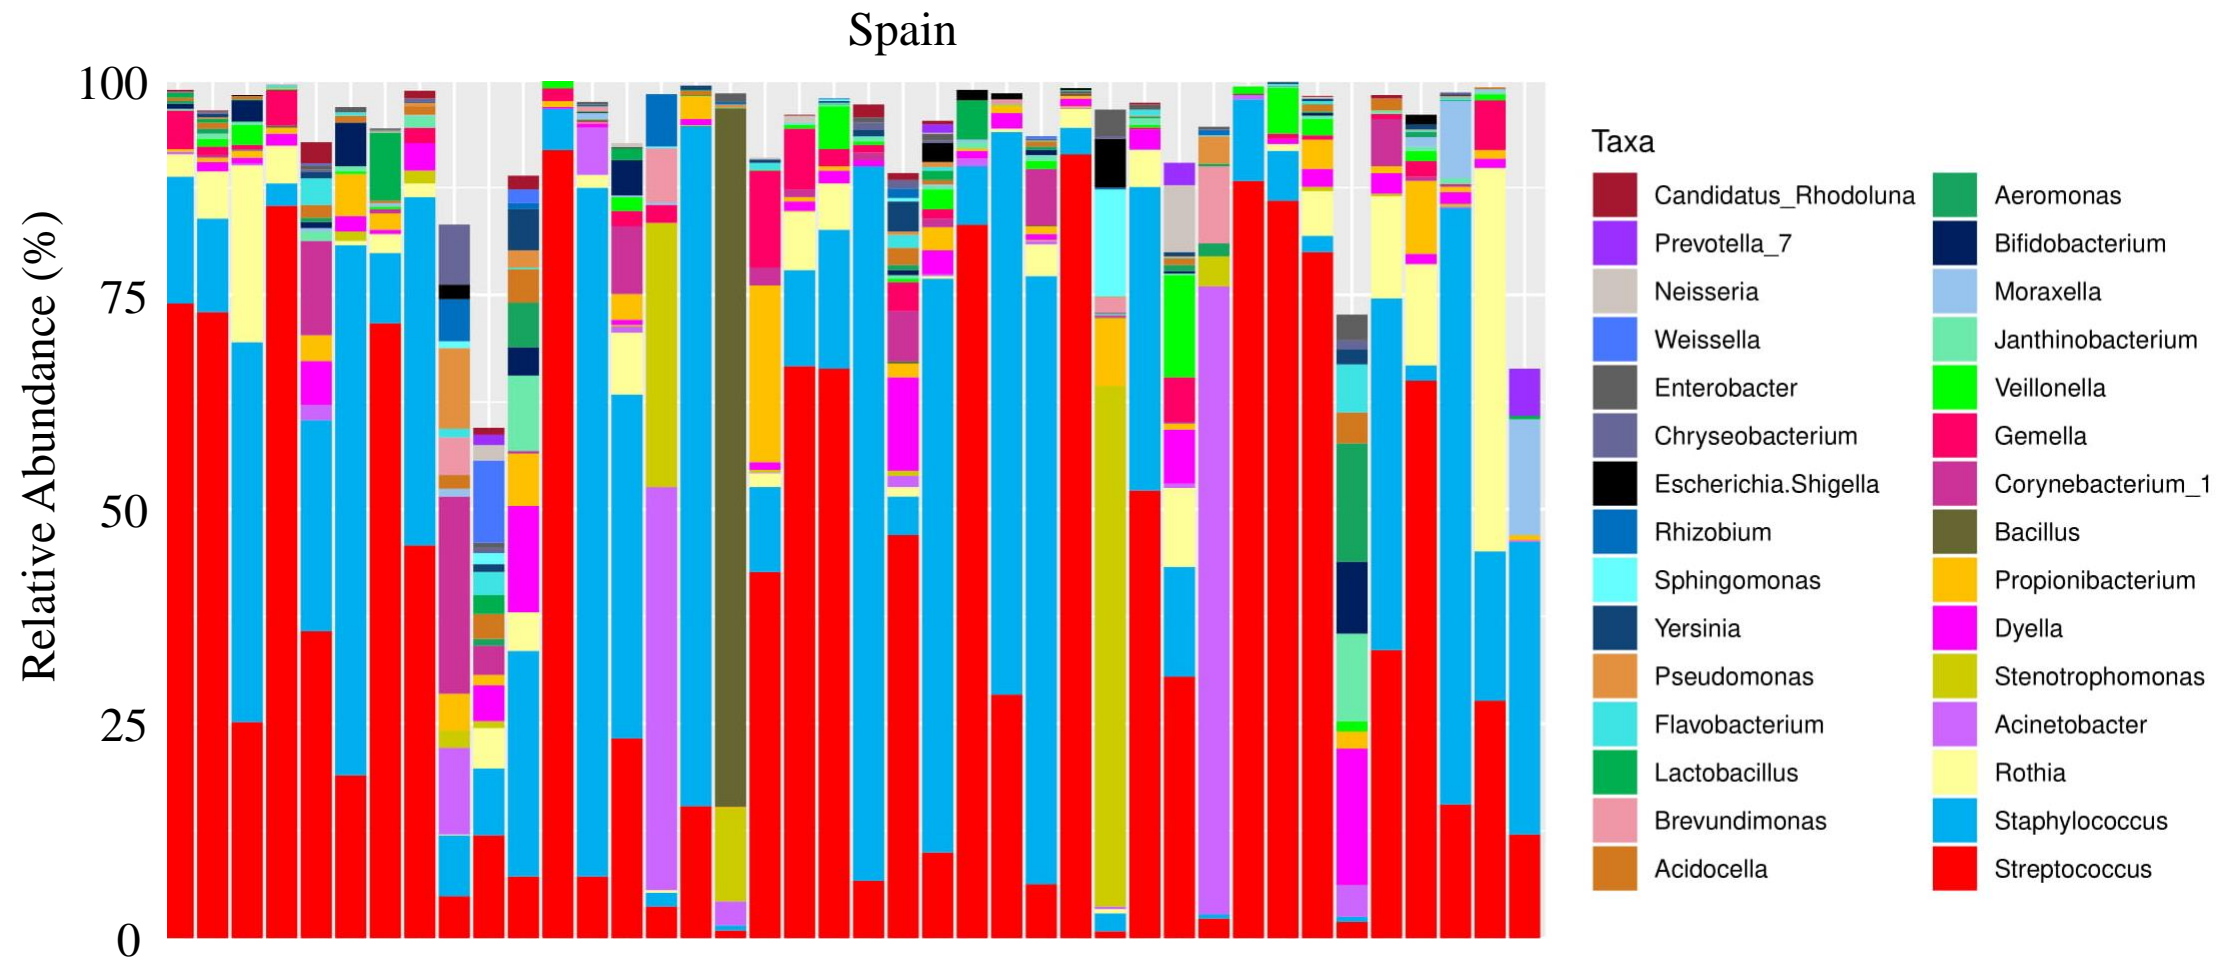

**Supplementary Figure 22.** Relative abundance of the 30 most-abundant genera in milk samples ( $n = 23$ ) collected in Sweden. Each bar represents a single sample.

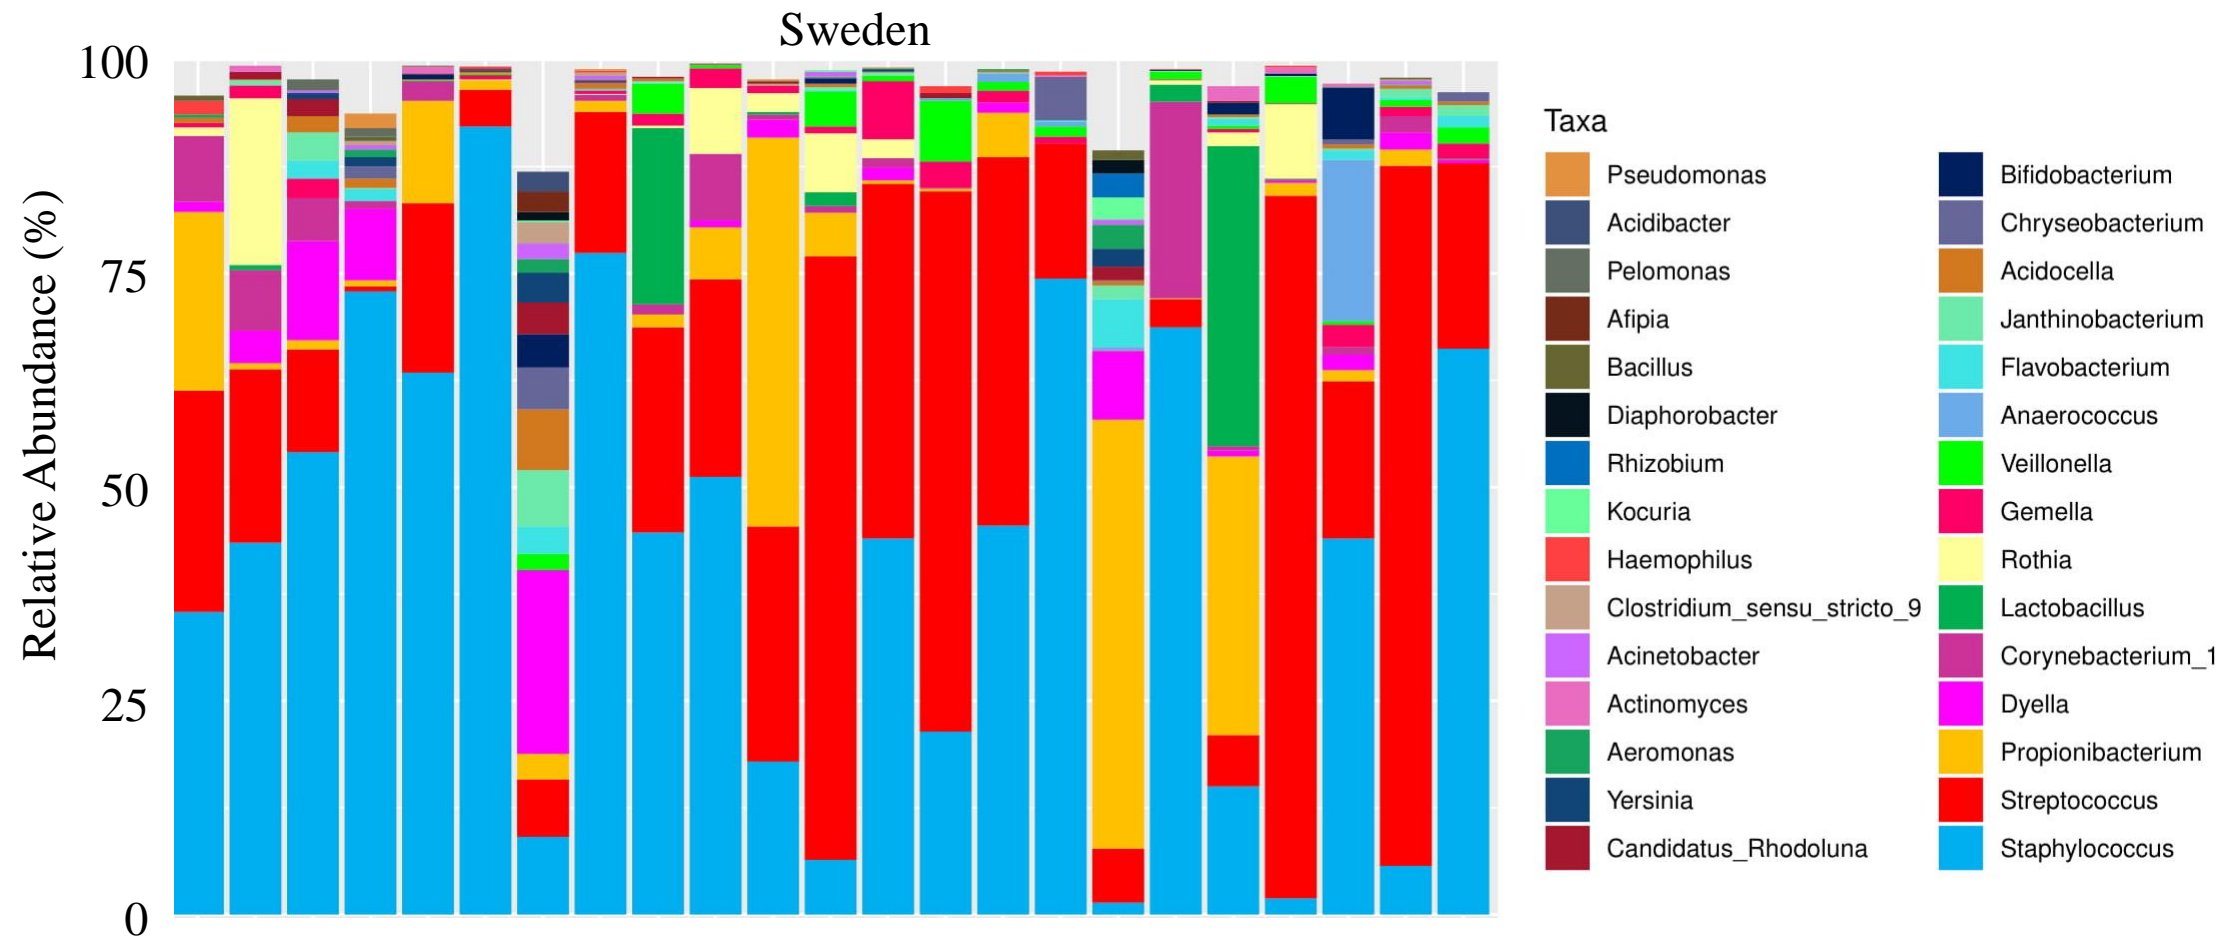

**Supplementary Figure 23.** Relative abundance of the 30 most-abundant genera in milk samples ( $n = 19$ ) collected in US California. Each bar represents a single sample.

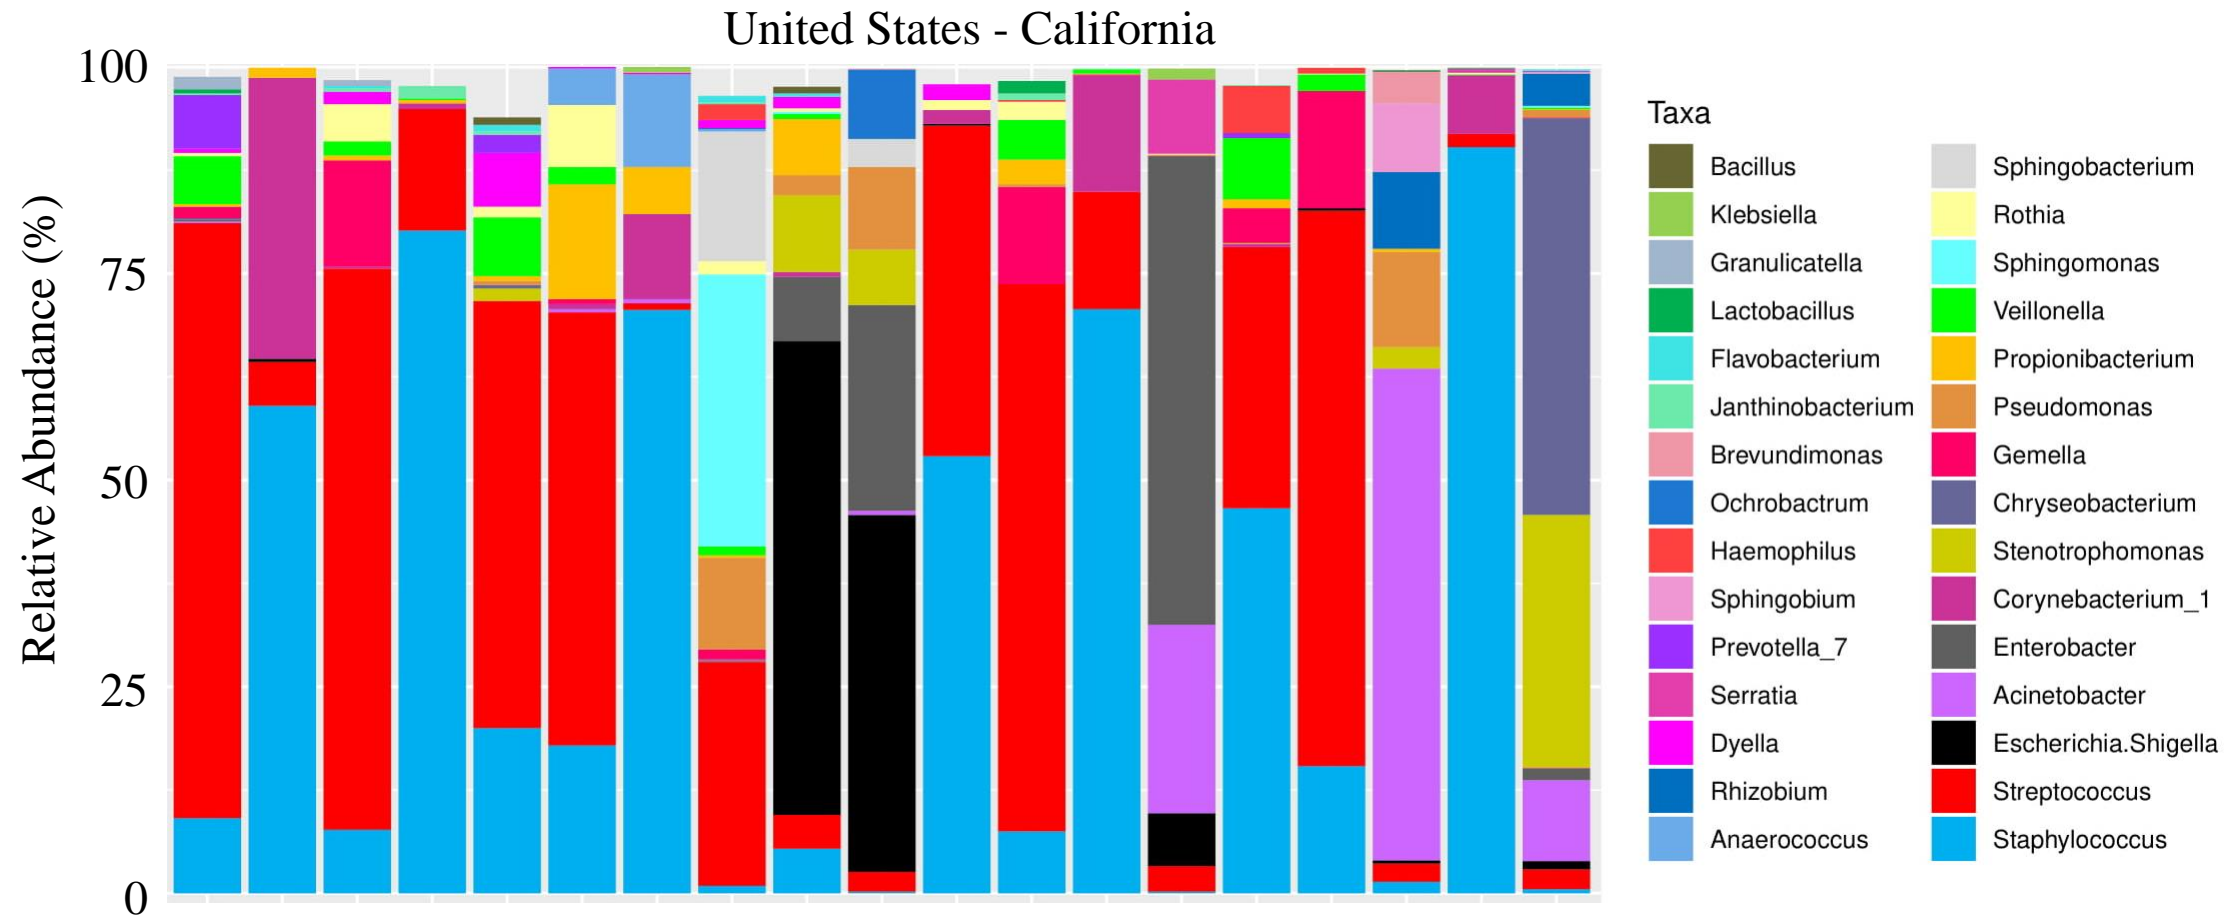



**Supplementary Figure 24.** Relative abundance of the 30 most-abundant genera in milk samples ( $n = 39$ ) collected in US Washington. Each bar represents a single sample.

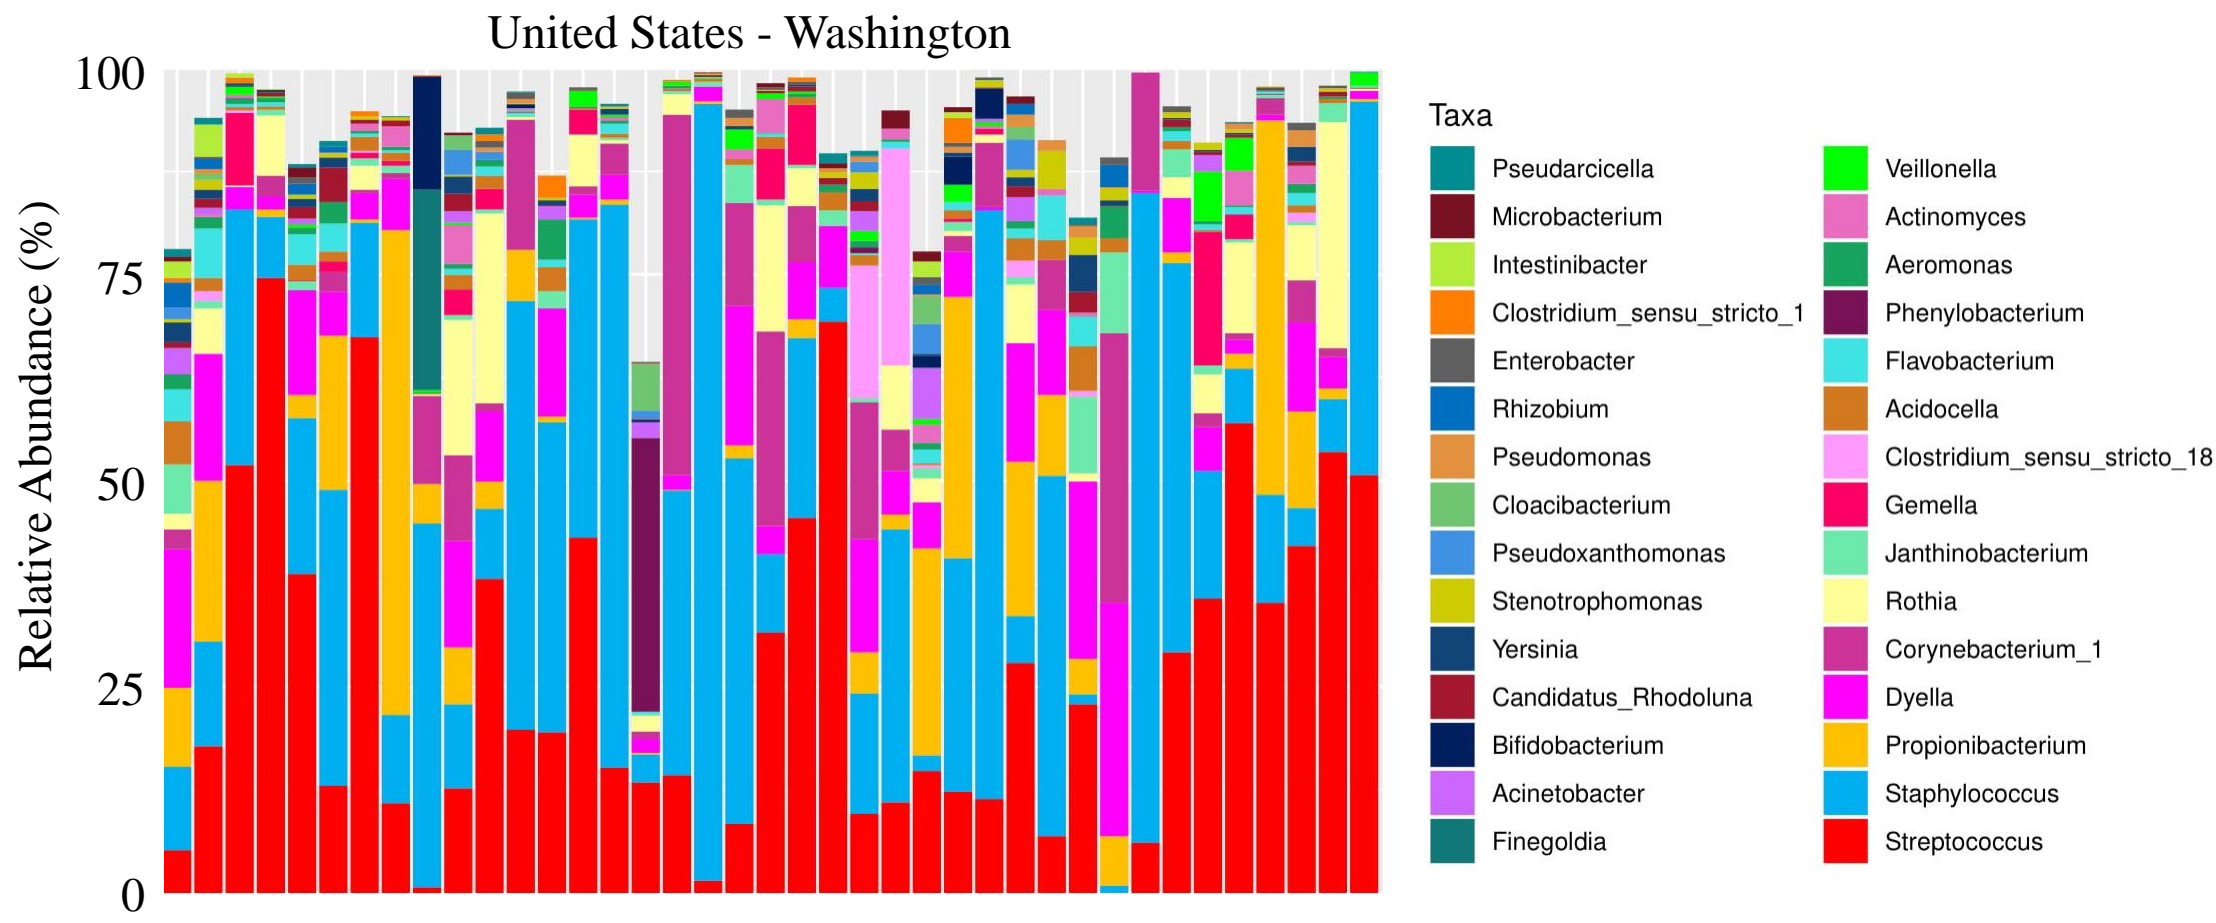

Supplement: Supplementary file [file 14905988]
